# Supplementary material for: In Vitro Metabolism of Six C-Glycosidic Flavonoids from Passiflora incarnata L
Source: MDPI journal article supplement (doi:10.3390/ijms22126566), 2021-06-18
Supplement: s1 [file s1]

## Supporting Information

### ***In vitro* metabolization of six C-glycosidic flavonoids from *Passiflora incarnata* L.**

Martina Tremmel<sup>1</sup>, Josef Kiermaier<sup>2</sup>, Jörg Heilmann<sup>1</sup>

<sup>1</sup> University of Regensburg, Institute of Chemistry and Pharmacy, Department of Pharmaceutical Biology, Universitätsstr. 31, 93053 Regensburg, Germany

<sup>2</sup> University of Regensburg, Institute of Chemistry and Pharmacy, Department of Central Analytics, Universitätsstr. 31, 93053 Regensburg, Germany

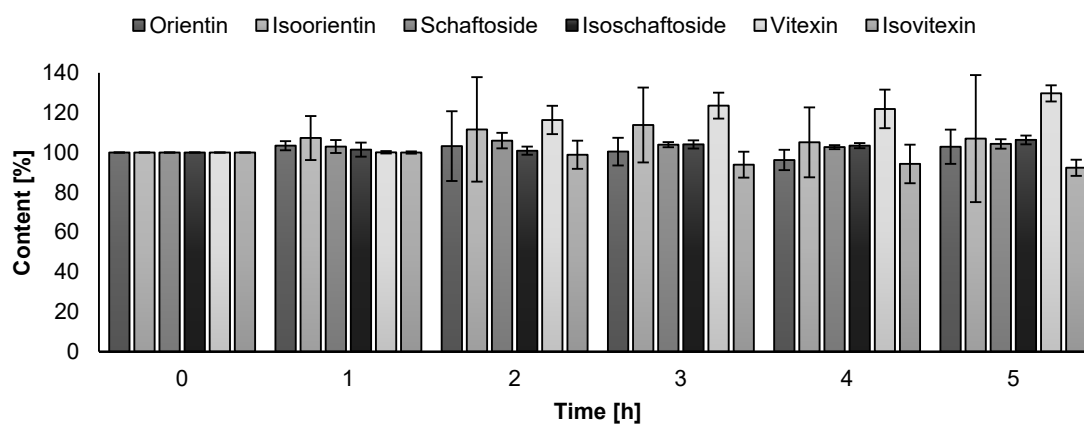

**Figure S1.** Stability testing of O, IO, S, IS, V and IV diluted in HBSS (pH 6.0; 10  $\mu$ M) in an atmosphere of 5% CO<sub>2</sub> and 90% of relative humidity at 37 °C (n = 3). Data are presented as mean +/- SD.

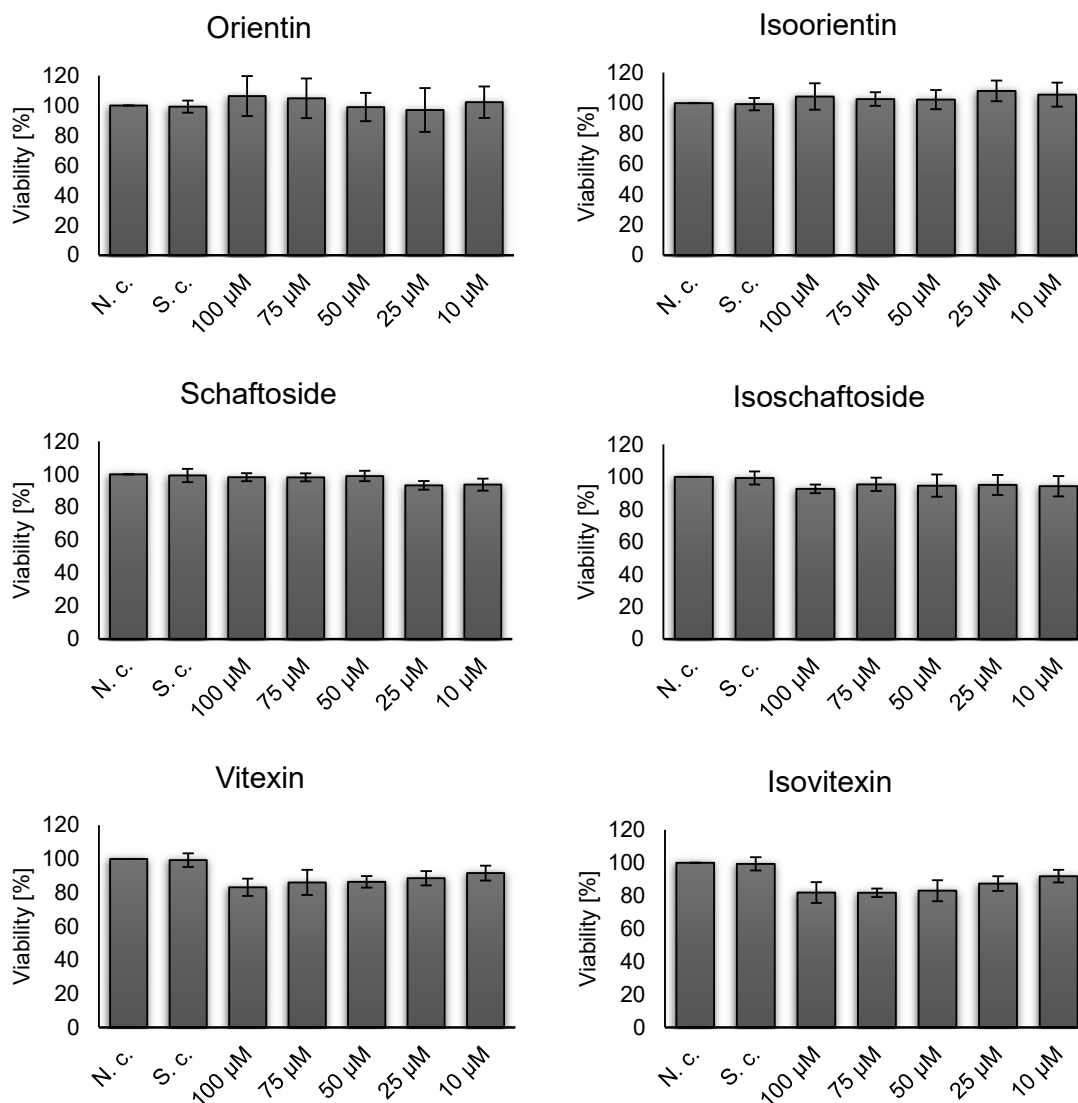

**Figure S2.** Results of the MTT assay under metabolization conditions. N.c.: negative control (HBSS); S.c.: solvent control (0.5% DMSO in HBSS); n = 3. Data are presented as mean +/- SD.

**Table S1.:** Compound library of orientin.

| Molecular formula                                              | Exact mass | Compound                                       |
|----------------------------------------------------------------|------------|------------------------------------------------|
| C <sub>21</sub> H <sub>20</sub> O <sub>11</sub>                | 448.1006   | Orientin                                       |
| C <sub>15</sub> H <sub>10</sub> O <sub>6</sub>                 | 286.0477   | Luteolin                                       |
| C <sub>7</sub> H <sub>8</sub> O <sub>2</sub>                   | 124.0524   | Dihydroxy-toluene                              |
| C <sub>7</sub> H <sub>6</sub> O <sub>3</sub>                   | 138.0317   | Hydroxy-benzoic acid                           |
| C <sub>8</sub> H <sub>8</sub> O <sub>3</sub>                   | 152.0473   | Hydroxy-phenylacetic acid                      |
| C <sub>8</sub> H <sub>8</sub> O <sub>4</sub>                   | 168.0423   | Dihydroxy-phenylacetic acid                    |
| C <sub>9</sub> H <sub>10</sub> O <sub>4</sub>                  | 182.0579   | Hydroxy-methoxy-phenylacetic acid              |
| C <sub>6</sub> H <sub>6</sub> O <sub>3</sub>                   | 126.0317   | Phloroglucinol                                 |
| C <sub>6</sub> H <sub>6</sub> O <sub>6</sub> S                 | 205.9885   | Phloroglucinol-sulfate                         |
| C <sub>12</sub> H <sub>14</sub> O <sub>9</sub>                 | 302.0638   | Phloroglucinol-glucuronide                     |
| C <sub>7</sub> H <sub>8</sub> O <sub>3</sub>                   | 140.0473   | Methyl-phloroglucinol                          |
| C <sub>8</sub> H <sub>8</sub> O <sub>6</sub> S                 | 232.0042   | Hydroxy-phenylacetic acid-sulfate              |
| C <sub>14</sub> H <sub>16</sub> O <sub>9</sub>                 | 328.0794   | Hydroxy-phenylacetic acid-glucuronide          |
| C <sub>10</sub> H <sub>11</sub> NO <sub>4</sub>                | 209.0688   | Hydroxy-phenylacetic acid-glycine conjugate    |
| C <sub>11</sub> H <sub>11</sub> NO <sub>4</sub>                | 223.0845   | Hydroxy-phenylpropionic acid-glycine conjugate |
| C <sub>9</sub> H <sub>10</sub> O <sub>6</sub> S                | 246.0198   | Hydroxy-phenylpropionic acid-sulfate           |
| C <sub>15</sub> H <sub>18</sub> O <sub>9</sub>                 | 342.0951   | Hydroxy-phenylpropionic acid-glucuronide       |
| C <sub>15</sub> H <sub>16</sub> O <sub>9</sub>                 | 340.0794   | Hydroxy-cinnamic acid-glucuronide              |
| C <sub>9</sub> H <sub>8</sub> O <sub>6</sub> S                 | 244.0042   | Hydroxy-cinnamic acid-sulfate                  |
| C <sub>9</sub> H <sub>8</sub> O <sub>4</sub>                   | 180.0423   | Caffeic acid                                   |
| C <sub>9</sub> H <sub>8</sub> O <sub>7</sub> S                 | 259.9991   | Caffeic acid-sulfate                           |
| C <sub>15</sub> H <sub>16</sub> O <sub>10</sub>                | 356.0743   | Caffeic acid-glucuronide                       |
| C <sub>10</sub> H <sub>10</sub> O <sub>4</sub>                 | 194.0579   | Ferulic acid                                   |
| C <sub>10</sub> H <sub>10</sub> O <sub>7</sub> S               | 274.0147   | Ferulic acid-sulfate                           |
| C <sub>16</sub> H <sub>18</sub> O <sub>10</sub>                | 370.0900   | Ferulic acid-glucuronide                       |
| C <sub>9</sub> H <sub>10</sub> O <sub>4</sub>                  | 182.0597   | Dihydroxy-phenylpropionic acid                 |
| C <sub>9</sub> H <sub>10</sub> O <sub>3</sub>                  | 166.0630   | Hydroxy-phenylpropionic acid                   |
| C <sub>9</sub> H <sub>8</sub> O <sub>3</sub>                   | 164.0473   | Hydroxy-phenylacrylic acid                     |
| C <sub>10</sub> H <sub>12</sub> O <sub>4</sub>                 | 196.0736   | Hydroxy-methoxy-phenylpropionic acid           |
| C <sub>16</sub> H <sub>12</sub> O <sub>6</sub>                 | 300.0634   | Methoxy-luteolin                               |
| C <sub>15</sub> H <sub>10</sub> O <sub>7</sub>                 | 302.0427   | Hydroxy-luteolin                               |
| C <sub>16</sub> H <sub>12</sub> O <sub>7</sub>                 | 316.0583   | Hydroxy-methoxy-luteolin                       |
| C <sub>17</sub> H <sub>14</sub> O <sub>6</sub>                 | 314.0790   | Dimethoxy-luteolin                             |
| C <sub>18</sub> H <sub>16</sub> O <sub>6</sub>                 | 328.0947   | Trimethoxy-luteolin                            |
| C <sub>17</sub> H <sub>14</sub> O <sub>7</sub>                 | 330.0740   | Hydroxy-dimethoxy-luteolin                     |
| C <sub>18</sub> H <sub>16</sub> O <sub>7</sub>                 | 344.0896   | Hydroxy-trimethoxy-luteolin                    |
| C <sub>21</sub> H <sub>18</sub> O <sub>12</sub>                | 462.0798   | Luteolin-glucuronide                           |
| C <sub>15</sub> H <sub>10</sub> O <sub>9</sub> S               | 366.0046   | Luteolin-sulfate                               |
| C <sub>27</sub> H <sub>26</sub> O <sub>18</sub>                | 638.1119   | Luteolin-diglucuronide                         |
| C <sub>15</sub> H <sub>10</sub> O <sub>12</sub> S <sub>2</sub> | 445.9614   | Luteolin-disulfate                             |
| C <sub>21</sub> H <sub>18</sub> O <sub>5</sub> S               | 542.0366   | Luteolin-glucuronide-sulfate                   |
| C <sub>15</sub> H <sub>10</sub> O <sub>10</sub> S              | 381.9995   | Hydroxy-luteolin-sulfate                       |
| C <sub>21</sub> H <sub>18</sub> O <sub>13</sub>                | 478.0747   | Hydroxy-luteolin-glucuronide                   |
| C <sub>22</sub> H <sub>20</sub> O <sub>13</sub>                | 492.0904   | Hydroxy-methoxy-luteolin-glucuronide           |

|                                                                |          |                                      |
|----------------------------------------------------------------|----------|--------------------------------------|
| C <sub>27</sub> H <sub>26</sub> O <sub>19</sub>                | 654.1068 | Hydroxy-luteolin-diglucuronide       |
| C <sub>21</sub> H <sub>10</sub> O <sub>13</sub> S <sub>2</sub> | 461.9563 | Hydroxy-luteolin-disulfate           |
| C <sub>21</sub> H <sub>18</sub> O <sub>16</sub> S              | 558.0316 | Hydroxy-luteolin-glucuronide-sulfate |
| C <sub>16</sub> H <sub>12</sub> O <sub>10</sub> S              | 396.0151 | Hydroxy-methoxy-luteolin-sulfate     |
| C <sub>16</sub> H <sub>12</sub> O <sub>9</sub> S               | 380.0202 | Methoxy-luteolin-sulfate             |
| C <sub>22</sub> H <sub>20</sub> O <sub>12</sub>                | 476.1955 | Methoxy-luteolin-glucuronide         |
| C <sub>21</sub> H <sub>20</sub> O <sub>12</sub>                | 464.0955 | Hydroxy-orientin                     |
| C <sub>22</sub> H <sub>22</sub> O <sub>12</sub>                | 478.1111 | Hydroxy-methoxy-orientin             |
| C <sub>22</sub> H <sub>22</sub> O <sub>11</sub>                | 462.1162 | Methoxy-orientin                     |
| C <sub>21</sub> H <sub>20</sub> O <sub>14</sub> S              | 528.0574 | Orientin-sulfate                     |
| C <sub>21</sub> H <sub>20</sub> O <sub>15</sub> S              | 544.0523 | Hydroxy-orientin-sulfate             |
| C <sub>27</sub> H <sub>28</sub> O <sub>18</sub>                | 640.1276 | Hydroxy-orientin-glucuronide         |
| C <sub>27</sub> H <sub>28</sub> O <sub>17</sub>                | 624.1326 | Orientin-glucuronide                 |
| C <sub>22</sub> H <sub>22</sub> O <sub>14</sub> S              | 542.0730 | Methoxy-orientin-sulfate             |
| C <sub>28</sub> H <sub>30</sub> O <sub>17</sub>                | 638.1483 | Methoxy-orientin-glucuronide         |
| C <sub>28</sub> H <sub>30</sub> O <sub>18</sub>                | 654.1432 | Hydroxy-methoxy-orientin-glucuronide |
| C <sub>22</sub> H <sub>22</sub> O <sub>15</sub> S              | 558.0679 | Hydroxy-methoxy-orientin-sulfate     |
| C <sub>27</sub> H <sub>28</sub> O <sub>21</sub> S              | 720.0844 | Hydroxy-orientin-glucuronide-sulfate |
| C <sub>27</sub> H <sub>28</sub> O <sub>20</sub> S              | 704.0895 | Orientin-glucuronide-sulfate         |
| C <sub>33</sub> H <sub>36</sub> O <sub>23</sub>                | 800.1647 | Orientin-diglucuronide               |
| C <sub>21</sub> H <sub>20</sub> O <sub>17</sub> S <sub>2</sub> | 608.0142 | Orientin-disulfate                   |
| C <sub>33</sub> H <sub>36</sub> O <sub>24</sub>                | 816.1597 | Hydroxy-orientin-diglucuronide       |
| C <sub>21</sub> H <sub>20</sub> O <sub>18</sub> S <sub>2</sub> | 624.0091 | Hydroxy-orientin-disulfate           |

**Table S2.:** Compound library of isoorientin.

| Molecular formula                                              | Exact mass | Compound                                       |
|----------------------------------------------------------------|------------|------------------------------------------------|
| C <sub>21</sub> H <sub>20</sub> O <sub>11</sub>                | 448.1006   | Isoorientin                                    |
| C <sub>15</sub> H <sub>10</sub> O <sub>6</sub>                 | 286.0477   | Luteolin                                       |
| C <sub>7</sub> H <sub>8</sub> O <sub>2</sub>                   | 124.0524   | Dihydroxy-toluene                              |
| C <sub>7</sub> H <sub>6</sub> O <sub>3</sub>                   | 138.0317   | Hydroxy-benzoic acid                           |
| C <sub>8</sub> H <sub>8</sub> O <sub>3</sub>                   | 152.0473   | Hydroxy-phenylacetic acid                      |
| C <sub>8</sub> H <sub>8</sub> O <sub>4</sub>                   | 168.0423   | Dihydroxy-phenylacetic acid                    |
| C <sub>9</sub> H <sub>10</sub> O <sub>4</sub>                  | 182.0579   | Hydroxy-methoxy-phenylacetic acid              |
| C <sub>6</sub> H <sub>6</sub> O <sub>3</sub>                   | 126.0317   | Phloroglucinol                                 |
| C <sub>6</sub> H <sub>6</sub> O <sub>6</sub> S                 | 205.9885   | Phloroglucinol-sulfate                         |
| C <sub>12</sub> H <sub>14</sub> O <sub>9</sub>                 | 302.0638   | Phloroglucinol-glucuronide                     |
| C <sub>7</sub> H <sub>8</sub> O <sub>3</sub>                   | 140.0473   | Methyl-phloroglucinol                          |
| C <sub>8</sub> H <sub>8</sub> O <sub>6</sub> S                 | 232.0042   | Hydroxy-phenylacetic acid-sulfate              |
| C <sub>14</sub> H <sub>16</sub> O <sub>9</sub>                 | 328.0794   | Hydroxy-phenylacetic acid-glucuronide          |
| C <sub>10</sub> H <sub>11</sub> NO <sub>4</sub>                | 209.0688   | Hydroxy-phenylacetic acid-glycine conjugate    |
| C <sub>11</sub> H <sub>11</sub> NO <sub>4</sub>                | 223.0845   | Hydroxy-phenylpropionic acid-glycine conjugate |
| C <sub>9</sub> H <sub>10</sub> O <sub>6</sub> S                | 246.0198   | Hydroxy-phenylpropionic acid-sulfate           |
| C <sub>15</sub> H <sub>18</sub> O <sub>9</sub>                 | 342.0951   | Hydroxy-phenylpropionic acid-glucuronide       |
| C <sub>15</sub> H <sub>16</sub> O <sub>9</sub>                 | 340.0794   | Hydroxy-cinnamic acid-glucuronide              |
| C <sub>9</sub> H <sub>8</sub> O <sub>6</sub> S                 | 244.0042   | Hydroxy-cinnamic acid-sulfate                  |
| C <sub>9</sub> H <sub>8</sub> O <sub>4</sub>                   | 180.0423   | Caffeic acid                                   |
| C <sub>9</sub> H <sub>8</sub> O <sub>7</sub> S                 | 259.9991   | Caffeic acid-sulfate                           |
| C <sub>15</sub> H <sub>16</sub> O <sub>10</sub>                | 356.0743   | Caffeic acid-glucuronide                       |
| C <sub>10</sub> H <sub>10</sub> O <sub>4</sub>                 | 194.0579   | Ferulic acid                                   |
| C <sub>10</sub> H <sub>10</sub> O <sub>7</sub> S               | 274.0147   | Ferulic acid-sulfate                           |
| C <sub>16</sub> H <sub>18</sub> O <sub>10</sub>                | 370.0900   | Ferulic acid-glucuronide                       |
| C <sub>9</sub> H <sub>10</sub> O <sub>4</sub>                  | 182.0597   | Dihydroxy-phenylpropionic acid                 |
| C <sub>9</sub> H <sub>10</sub> O <sub>3</sub>                  | 166.0630   | Hydroxy-phenylpropionic acid                   |
| C <sub>9</sub> H <sub>8</sub> O <sub>3</sub>                   | 164.0473   | Hydroxy-phenylacrylic acid                     |
| C <sub>10</sub> H <sub>12</sub> O <sub>4</sub>                 | 196.0736   | Hydroxy-methoxy-phenylpropionic acid           |
| C <sub>16</sub> H <sub>12</sub> O <sub>6</sub>                 | 300.0634   | Methoxy-luteolin                               |
| C <sub>15</sub> H <sub>10</sub> O <sub>7</sub>                 | 302.0427   | Hydroxy-luteolin                               |
| C <sub>16</sub> H <sub>12</sub> O <sub>7</sub>                 | 316.0583   | Hydroxy-methoxy-luteolin                       |
| C <sub>17</sub> H <sub>14</sub> O <sub>6</sub>                 | 314.0790   | Dimethoxy-luteolin                             |
| C <sub>18</sub> H <sub>16</sub> O <sub>6</sub>                 | 328.0947   | Trimethoxy-luteolin                            |
| C <sub>17</sub> H <sub>14</sub> O <sub>7</sub>                 | 330.0740   | Hydroxy-dimethoxy-luteolin                     |
| C <sub>18</sub> H <sub>16</sub> O <sub>7</sub>                 | 344.0896   | Hydroxy-trimethoxy-luteolin                    |
| C <sub>21</sub> H <sub>18</sub> O <sub>12</sub>                | 462.0798   | Luteolin-glucuronide                           |
| C <sub>15</sub> H <sub>10</sub> O <sub>9</sub> S               | 366.0046   | Luteolin-sulfate                               |
| C <sub>27</sub> H <sub>26</sub> O <sub>18</sub>                | 638.1119   | Luteolin-diglucuronide                         |
| C <sub>15</sub> H <sub>10</sub> O <sub>12</sub> S <sub>2</sub> | 445.9614   | Luteolin-disulfate                             |
| C <sub>21</sub> H <sub>18</sub> O <sub>5</sub> S               | 542.0366   | Luteolin-glucuronide-sulfate                   |
| C <sub>15</sub> H <sub>10</sub> O <sub>10</sub> S              | 381.9995   | Hydroxy-luteolin-sulfate                       |
| C <sub>21</sub> H <sub>18</sub> O <sub>13</sub>                | 478.0747   | Hydroxy-luteolin-glucuronide                   |
| C <sub>22</sub> H <sub>20</sub> O <sub>13</sub>                | 492.0904   | Hydroxy-methoxy-luteolin-glucuronide           |

|                                                                |          |                                         |
|----------------------------------------------------------------|----------|-----------------------------------------|
| C <sub>27</sub> H <sub>26</sub> O <sub>19</sub>                | 654.1068 | Hydroxy-luteolin-diglucuronide          |
| C <sub>21</sub> H <sub>10</sub> O <sub>13</sub> S <sub>2</sub> | 461.9563 | Hydroxy-luteolin-disulfate              |
| C <sub>21</sub> H <sub>18</sub> O <sub>16</sub> S              | 558.0316 | Hydroxy-luteolin-glucuronide-sulfate    |
| C <sub>16</sub> H <sub>12</sub> O <sub>10</sub> S              | 396.0151 | Hydroxy-methoxy-luteolin-sulfate        |
| C <sub>16</sub> H <sub>12</sub> O <sub>9</sub> S               | 380.0202 | Methoxy-luteolin-sulfate                |
| C <sub>22</sub> H <sub>20</sub> O <sub>12</sub>                | 476.1955 | Methoxy-luteolin-glucuronide            |
| C <sub>21</sub> H <sub>20</sub> O <sub>12</sub>                | 464.0955 | Hydroxy-orientin                        |
| C <sub>22</sub> H <sub>22</sub> O <sub>12</sub>                | 478.1111 | Hydroxy-methoxy-orientin                |
| C <sub>22</sub> H <sub>22</sub> O <sub>11</sub>                | 462.1162 | Methoxy-orientin                        |
| C <sub>21</sub> H <sub>20</sub> O <sub>14</sub> S              | 528.0574 | Orientin-sulfate                        |
| C <sub>21</sub> H <sub>20</sub> O <sub>15</sub> S              | 544.0523 | Hydroxy-isoorientin-sulfate             |
| C <sub>27</sub> H <sub>28</sub> O <sub>18</sub>                | 640.1276 | Hydroxy-isoorientin-glucuronide         |
| C <sub>27</sub> H <sub>28</sub> O <sub>17</sub>                | 624.1326 | Isoorientin-glucuronide                 |
| C <sub>22</sub> H <sub>22</sub> O <sub>14</sub> S              | 542.0730 | Methoxy-isoorientin-sulfate             |
| C <sub>28</sub> H <sub>30</sub> O <sub>17</sub>                | 638.1483 | Methoxy-isoorientin-glucuronide         |
| C <sub>28</sub> H <sub>30</sub> O <sub>18</sub>                | 654.1432 | Hydroxy-methoxy-isoorientin-glucuronide |
| C <sub>22</sub> H <sub>22</sub> O <sub>15</sub> S              | 558.0679 | Hydroxy-methoxy-isoorientin-sulfate     |
| C <sub>27</sub> H <sub>28</sub> O <sub>21</sub> S              | 720.0844 | Hydroxy-isoorientin-glucuronide-sulfate |
| C <sub>27</sub> H <sub>28</sub> O <sub>20</sub> S              | 704.0895 | Isoorientin-glucuronide-sulfate         |
| C <sub>33</sub> H <sub>36</sub> O <sub>23</sub>                | 800.1647 | Isoorientin-diglucuronide               |
| C <sub>21</sub> H <sub>20</sub> O <sub>17</sub> S <sub>2</sub> | 608.0142 | Isoorientin-disulfate                   |
| C <sub>33</sub> H <sub>36</sub> O <sub>24</sub>                | 816.1597 | Hydroxy-isoorientin-diglucuronide       |
| C <sub>21</sub> H <sub>20</sub> O <sub>18</sub> S <sub>2</sub> | 624.0091 | Hydroxy-isoorientin-disulfate           |

**Table S3.:** Compound library of schaftoside.

| Molecular formula                                              | Exact mass | Compound                                       |
|----------------------------------------------------------------|------------|------------------------------------------------|
| C <sub>26</sub> H <sub>28</sub> O <sub>14</sub>                | 564.1479   | Schaftoside                                    |
| C <sub>15</sub> H <sub>10</sub> O <sub>5</sub>                 | 270.528    | Apigenin                                       |
| C <sub>7</sub> H <sub>8</sub> O <sub>2</sub>                   | 124.0524   | Dihydroxy-toluene                              |
| C <sub>7</sub> H <sub>6</sub> O <sub>3</sub>                   | 138.0317   | Hydroxy-benzoic acid                           |
| C <sub>8</sub> H <sub>8</sub> O <sub>3</sub>                   | 152.0473   | Hydroxy-phenylacetic acid                      |
| C <sub>8</sub> H <sub>8</sub> O <sub>4</sub>                   | 168.0423   | Dihydroxy-phenylacetic acid                    |
| C <sub>9</sub> H <sub>10</sub> O <sub>4</sub>                  | 182.0579   | Hydroxy-methoxy-phenylacetic acid              |
| C <sub>6</sub> H <sub>6</sub> O <sub>3</sub>                   | 126.0317   | Phloroglucinol                                 |
| C <sub>6</sub> H <sub>6</sub> O <sub>6</sub> S                 | 205.9885   | Phloroglucinol-sulfate                         |
| C <sub>12</sub> H <sub>14</sub> O <sub>9</sub>                 | 302.0638   | Phloroglucinol-glucuronide                     |
| C <sub>7</sub> H <sub>8</sub> O <sub>3</sub>                   | 140.0473   | Methyl-phloroglucinol                          |
| C <sub>8</sub> H <sub>8</sub> O <sub>6</sub> S                 | 232.0042   | Hydroxy-phenylacetic acid-sulfate              |
| C <sub>14</sub> H <sub>16</sub> O <sub>9</sub>                 | 328.0794   | Hydroxy-phenylacetic acid-glucuronide          |
| C <sub>10</sub> H <sub>11</sub> NO <sub>4</sub>                | 209.0688   | Hydroxy-phenylacetic acid-glycine conjugate    |
| C <sub>11</sub> H <sub>11</sub> NO <sub>4</sub>                | 223.0845   | Hydroxy-phenylpropionic acid-glycine conjugate |
| C <sub>9</sub> H <sub>10</sub> O <sub>6</sub> S                | 246.0198   | Hydroxy-phenylpropionic acid-sulfate           |
| C <sub>15</sub> H <sub>18</sub> O <sub>9</sub>                 | 342.0951   | Hydroxy-phenylpropionic acid-glucuronide       |
| C <sub>15</sub> H <sub>16</sub> O <sub>9</sub>                 | 340.0794   | Hydroxy-cinnamic acid-glucuronide              |
| C <sub>9</sub> H <sub>8</sub> O <sub>6</sub> S                 | 244.0042   | Hydroxy-cinnamic acid-sulfate                  |
| C <sub>9</sub> H <sub>8</sub> O <sub>4</sub>                   | 180.0423   | Caffeic acid                                   |
| C <sub>9</sub> H <sub>8</sub> O <sub>7</sub> S                 | 259.9991   | Caffeic acid-sulfate                           |
| C <sub>15</sub> H <sub>16</sub> O <sub>10</sub>                | 356.0743   | Caffeic acid-glucuronide                       |
| C <sub>10</sub> H <sub>10</sub> O <sub>4</sub>                 | 194.0579   | Ferulic acid                                   |
| C <sub>10</sub> H <sub>10</sub> O <sub>7</sub> S               | 274.0147   | Ferulic acid-sulfate                           |
| C <sub>16</sub> H <sub>18</sub> O <sub>10</sub>                | 370.0900   | Ferulic acid-glucuronide                       |
| C <sub>9</sub> H <sub>10</sub> O <sub>4</sub>                  | 182.0597   | Dihydroxy-phenylpropionic acid                 |
| C <sub>9</sub> H <sub>10</sub> O <sub>3</sub>                  | 166.0630   | Hydroxy-phenylpropionic acid                   |
| C <sub>9</sub> H <sub>8</sub> O <sub>3</sub>                   | 164.0473   | Hydroxy-phenylacrylic acid                     |
| C <sub>10</sub> H <sub>12</sub> O <sub>4</sub>                 | 196.0736   | Hydroxy-methoxy-phenylpropionic acid           |
| C <sub>16</sub> H <sub>12</sub> O <sub>5</sub>                 | 284.0685   | Methoxy-apigenin                               |
| C <sub>17</sub> H <sub>14</sub> O <sub>5</sub>                 | 298.0841   | Dimethoxy-apigenin                             |
| C <sub>15</sub> H <sub>10</sub> O <sub>6</sub>                 | 286.477    | Hydroxy-apigenin                               |
| C <sub>16</sub> H <sub>12</sub> O <sub>6</sub>                 | 300.0634   | Hydroxy-methoxy-apigenin                       |
| C <sub>17</sub> H <sub>14</sub> O <sub>6</sub>                 | 314.0790   | Hydroxy-dimethoxy-apigeninr                    |
| C <sub>18</sub> H <sub>16</sub> O <sub>6</sub>                 | 328.0947   | Hydroxy-trimethoxy-apigeninr                   |
| C <sub>15</sub> H <sub>10</sub> O <sub>8</sub> S               | 350.0096   | Apigenin-sulfate                               |
| C <sub>21</sub> H <sub>18</sub> O <sub>11</sub>                | 446.0849   | Apigenin-glucuronide                           |
| C <sub>27</sub> H <sub>26</sub> O <sub>17</sub>                | 622.1170   | Apigenin-diglucuronide                         |
| C <sub>15</sub> H <sub>10</sub> O <sub>11</sub> S <sub>2</sub> | 429.9665   | Apigenin-disulfate                             |
| C <sub>21</sub> H <sub>18</sub> O <sub>14</sub> S              | 526.0417   | Apigenin-glucuronide-sulfate                   |
| C <sub>15</sub> H <sub>10</sub> O <sub>9</sub> S               | 366.0046   | Hydroxy-apigenin-sulfate                       |
| C <sub>16</sub> H <sub>12</sub> O <sub>8</sub> S               | 364.0253   | Methoxy-apigenin-sulfate                       |
| C <sub>16</sub> H <sub>12</sub> O <sub>9</sub> S               | 380.0202   | Hydroxy-methoxy-apigenin-sulfate               |
| C <sub>22</sub> H <sub>20</sub> O <sub>11</sub>                | 460.1006   | Methoxy-apigenin-glucuronide                   |

|                                                                |          |                                                    |
|----------------------------------------------------------------|----------|----------------------------------------------------|
| C <sub>21</sub> H <sub>18</sub> O <sub>12</sub>                | 462.0798 | Hydroxy-apigenin-glucuronide                       |
| C <sub>22</sub> H <sub>20</sub> O <sub>12</sub>                | 476.0955 | Hydroxy-methoxy-apigenin-glucuronide               |
| C <sub>15</sub> H <sub>10</sub> O <sub>12</sub> S <sub>2</sub> | 445.9614 | Hydroxy-apigenin-disulfate                         |
| C <sub>27</sub> H <sub>28</sub> O <sub>18</sub>                | 638.1119 | Hydroxy-apigenin-diglucuronide                     |
| C <sub>21</sub> H <sub>18</sub> O <sub>15</sub> S              | 542.0366 | Hydroxy-apigenin-glucuronide-sulfate               |
| C <sub>27</sub> H <sub>30</sub> O <sub>14</sub>                | 578.1636 | Methoxy-schaftoside                                |
| C <sub>27</sub> H <sub>30</sub> O <sub>15</sub>                | 594.1585 | Hydroxy-methoxy-schaftoside                        |
| C <sub>26</sub> H <sub>28</sub> O <sub>15</sub>                | 580.1428 | Hydroxy-schaftoside                                |
| C <sub>28</sub> H <sub>32</sub> O <sub>14</sub>                | 592.1792 | Dimethoxy-schaftoside                              |
| C <sub>28</sub> H <sub>32</sub> O <sub>15</sub>                | 608.1741 | Hydroxy-dimethoxy-schaftoside                      |
| C <sub>26</sub> H <sub>28</sub> O <sub>17</sub> S              | 644.1047 | Schaftoside-sulfate                                |
| C <sub>26</sub> H <sub>28</sub> O <sub>20</sub> S <sub>2</sub> | 724.0618 | Schaftoside-disulfate                              |
| C <sub>26</sub> H <sub>28</sub> O <sub>21</sub> S <sub>2</sub> | 740.0564 | Hydroxy-schaftoside-disulfate                      |
| C <sub>32</sub> H <sub>36</sub> O <sub>20</sub>                | 740.1800 | Schaftoside-glucuronide                            |
| C <sub>32</sub> H <sub>26</sub> O <sub>23</sub> S              | 820.1368 | Schaftoside-glucuronide-sulfate                    |
| C <sub>38</sub> H <sub>44</sub> O <sub>26</sub>                | 916.2121 | Schaftoside-diglucuronide                          |
| C <sub>32</sub> H <sub>36</sub> O <sub>24</sub> S              | 836.1317 | Hydroxy-schaftoside-glucuronide-sulfate            |
| C <sub>38</sub> H <sub>44</sub> O <sub>27</sub>                | 932.2070 | Hydroxy-schaftoside-diglucuronide                  |
| C <sub>33</sub> H <sub>38</sub> O <sub>20</sub>                | 754.1956 | Methoxy-schaftoside-glucuronide                    |
| C <sub>32</sub> H <sub>36</sub> O <sub>21</sub>                | 756.1749 | Hydroxy-schaftoside-glucuronide                    |
| C <sub>33</sub> H <sub>38</sub> O <sub>21</sub>                | 770.1906 | Hydroxy-methoxy-schaftoside-glucuronide            |
| C <sub>27</sub> H <sub>30</sub> O <sub>17</sub> S              | 658.1204 | Methoxy-schaftoside-sulfate                        |
| C <sub>26</sub> H <sub>28</sub> O <sub>18</sub> S              | 660.0996 | Hydroxy-schaftoside-sulfate                        |
| C <sub>27</sub> H <sub>30</sub> O <sub>18</sub> S              | 674.1153 | Hydroxy-methoxy-schaftoside-sulfate                |
| C <sub>22</sub> H <sub>22</sub> O <sub>10</sub>                | 446.1213 | Methoxy-apigenin-8-C-riboside                      |
| C <sub>22</sub> H <sub>22</sub> O <sub>11</sub>                | 462.1162 | Hydroxy-methoxy-apigenin-8-C-riboside              |
| C <sub>21</sub> H <sub>20</sub> O <sub>11</sub>                | 448.1006 | Hydroxy-apigenin-8-C-riboside                      |
| C <sub>23</sub> H <sub>24</sub> O <sub>10</sub>                | 460.1369 | Dimethoxy-apigenin-8-C-riboside                    |
| C <sub>23</sub> H <sub>24</sub> O <sub>11</sub>                | 476.1319 | Hydroxy-dimethoxy-apigenin-8-C-riboside            |
| C <sub>21</sub> H <sub>20</sub> O <sub>13</sub> S              | 512.0625 | Apigenin-8-C-riboside-sulfate                      |
| C <sub>21</sub> H <sub>20</sub> O <sub>16</sub> S <sub>2</sub> | 592.0193 | Apigenin-8-C-riboside-disulfate                    |
| C <sub>21</sub> H <sub>20</sub> O <sub>17</sub> S <sub>2</sub> | 608.0142 | Hydroxy-apigenin-8-C-riboside-disulfate            |
| C <sub>27</sub> H <sub>28</sub> O <sub>16</sub>                | 608.1377 | Apigenin-8-C-riboside-glucuronide                  |
| C <sub>27</sub> H <sub>28</sub> O <sub>19</sub> S              | 688.0945 | Apigenin-8-C-riboside-glucuronide-sulfate          |
| C <sub>33</sub> H <sub>36</sub> O <sub>22</sub>                | 784.1698 | Apigenin-8-C-riboside-diglucuronide                |
| C <sub>27</sub> H <sub>28</sub> O <sub>20</sub> S              | 704.0895 | Hydroxy-apigenin-8-C-riboside-glucuronide-sulfate  |
| C <sub>33</sub> H <sub>36</sub> O <sub>23</sub>                | 800.1647 | Hydroxy-apigenin-8-C-riboside-diglucuronide        |
| C <sub>28</sub> H <sub>30</sub> O <sub>16</sub>                | 622.1534 | Methoxy- apigenin-8-C-riboside-glucuronide         |
| C <sub>27</sub> H <sub>28</sub> O <sub>17</sub>                | 624.1326 | Hydroxy-apigenin-8-C-riboside-glucuronide          |
| C <sub>28</sub> H <sub>30</sub> O <sub>17</sub>                | 638.1483 | Hydroxy-methoxy- apigenin-8-C-riboside-glucuronide |
| C <sub>22</sub> H <sub>22</sub> O <sub>13</sub> S              | 526.0781 | Methoxy- apigenin-8-C-riboside-sulfate             |
| C <sub>21</sub> H <sub>20</sub> O <sub>14</sub> S              | 528.0574 | Hydroxy-apigenin-8-C-riboside-sulfate              |
| C <sub>22</sub> H <sub>22</sub> O <sub>14</sub> S              | 542.0730 | Hydroxy-methoxy-apigenin-8-C-riboside-sulfat       |
| C <sub>21</sub> H <sub>20</sub> O <sub>9</sub>                 | 416.1107 | Methoxy-apigenin-6-C-glucoside                     |
| C <sub>21</sub> H <sub>20</sub> O <sub>10</sub>                | 432.1056 | Hydroxy-methoxy- apigenin-6-C-glucoside            |
| C <sub>20</sub> H <sub>18</sub> O <sub>10</sub>                | 418.0900 | Hydroxy-apigenin-6-C-glucoside                     |
| C <sub>22</sub> H <sub>22</sub> O <sub>9</sub>                 | 430.1264 | Dimethoxy-apigenin-6-C-glucoside                   |



|                         |          |                                                    |
|-------------------------|----------|----------------------------------------------------|
| $C_{20}H_{20}O_{10}$    | 446.1213 | Hydroxy-dimethoxy-apigenin-6-C-glucoside           |
| $C_{20}H_{18}O_{12}S$   | 482.0519 | Apigenin-6-C-glucoside-sulfate                     |
| $C_{20}H_{18}O_{15}S_2$ | 562.0087 | Apigenin-6-C-glucoside-disulfate                   |
| $C_{20}H_{18}O_{16}S_2$ | 578.0036 | Hydroxy-apigenin-6-C-glucoside-disulfate           |
| $C_{26}H_{26}O_{15}$    | 578.1272 | Apigenin-6-C-glucoside-glucuronide                 |
| $C_{26}H_{26}O_{18}S$   | 658.0840 | Apigenin-6-C-glucoside-glucuronide-sulfate         |
| $C_{33}H_{34}O_{21}$    | 754.1593 | Apigenin-6-C-glucoside-diglucuronide               |
| $C_{26}H_{26}O_{19}S$   | 674.0789 | Hydroxy-apigenin-6-C-glucoside-glucuronide-sulfate |
| $C_{32}H_{34}O_{22}$    | 770.1542 | Hydroxy-apigenin-6-C-glucoside-diglucuronide       |
| $C_{27}H_{28}O_{15}$    | 592.1428 | Methoxy- Apigenin-6-C-glucoside-glucuronide        |
| $C_{26}H_{26}O_{16}$    | 594.1221 | Hydroxy-apigenin-6-C-glucoside-glucuronide         |
| $C_{27}H_{28}O_{16}$    | 608.1377 | Hydroxy-methoxy-apigenin-6-C-glucoside-glucuronide |
| $C_{21}H_{20}O_{12}S$   | 496.0675 | Methoxy-apigenin-6-C-glucoside-sulfate             |
| $C_{20}H_{18}O_{13}S$   | 498.0468 | Hydroxy-apigenin-6-C-glucoside-sulfate             |
| $C_{21}H_{20}O_{13}S$   | 512.0625 | Hydroxy-methoxy-apigenin-6-C-glucoside-sulfate     |

**Table S4.:** Compound library of isoschaftoside.

| Molecular formula                                              | Exact mass | Compound                                       |
|----------------------------------------------------------------|------------|------------------------------------------------|
| C <sub>26</sub> H <sub>28</sub> O <sub>14</sub>                | 564.1479   | Isoschaftoside                                 |
| C <sub>15</sub> H <sub>10</sub> O <sub>5</sub>                 | 270.528    | Apigenin                                       |
| C <sub>7</sub> H <sub>8</sub> O <sub>2</sub>                   | 124.0524   | Dihydroxy-toluene                              |
| C <sub>7</sub> H <sub>6</sub> O <sub>3</sub>                   | 138.0317   | Hydroxy-benzoic acid                           |
| C <sub>8</sub> H <sub>8</sub> O <sub>3</sub>                   | 152.0473   | Hydroxy-phenylacetic acid                      |
| C <sub>8</sub> H <sub>8</sub> O <sub>4</sub>                   | 168.0423   | Dihydroxy-phenylacetic acid                    |
| C <sub>9</sub> H <sub>10</sub> O <sub>4</sub>                  | 182.0579   | Hydroxy-methoxy-phenylacetic acid              |
| C <sub>6</sub> H <sub>6</sub> O <sub>3</sub>                   | 126.0317   | Phloroglucinol                                 |
| C <sub>6</sub> H <sub>6</sub> O <sub>6</sub> S                 | 205.9885   | Phloroglucinol-sulfate                         |
| C <sub>12</sub> H <sub>14</sub> O <sub>9</sub>                 | 302.0638   | Phloroglucinol-glucuronide                     |
| C <sub>7</sub> H <sub>8</sub> O <sub>3</sub>                   | 140.0473   | Methyl-phloroglucinol                          |
| C <sub>8</sub> H <sub>8</sub> O <sub>6</sub> S                 | 232.0042   | Hydroxy-phenylacetic acid-sulfate              |
| C <sub>14</sub> H <sub>16</sub> O <sub>9</sub>                 | 328.0794   | Hydroxy-phenylacetic acid-glucuronide          |
| C <sub>10</sub> H <sub>11</sub> NO <sub>4</sub>                | 209.0688   | Hydroxy-phenylacetic acid-glycine conjugate    |
| C <sub>11</sub> H <sub>11</sub> NO <sub>4</sub>                | 223.0845   | Hydroxy-phenylpropionic acid-glycine conjugate |
| C <sub>9</sub> H <sub>10</sub> O <sub>6</sub> S                | 246.0198   | Hydroxy-phenylpropionic acid-sulfate           |
| C <sub>15</sub> H <sub>18</sub> O <sub>9</sub>                 | 342.0951   | Hydroxy-phenylpropionic acid-glucuronide       |
| C <sub>15</sub> H <sub>16</sub> O <sub>9</sub>                 | 340.0794   | Hydroxy-cinnamic acid-glucuronide              |
| C <sub>9</sub> H <sub>8</sub> O <sub>6</sub> S                 | 244.0042   | Hydroxy-cinnamic acid-sulfate                  |
| C <sub>9</sub> H <sub>8</sub> O <sub>4</sub>                   | 180.0423   | Caffeic acid                                   |
| C <sub>9</sub> H <sub>8</sub> O <sub>7</sub> S                 | 259.9991   | Caffeic acid-sulfate                           |
| C <sub>15</sub> H <sub>16</sub> O <sub>10</sub>                | 356.0743   | Caffeic acid-glucuronide                       |
| C <sub>10</sub> H <sub>10</sub> O <sub>4</sub>                 | 194.0579   | Ferulic acid                                   |
| C <sub>10</sub> H <sub>10</sub> O <sub>7</sub> S               | 274.0147   | Ferulic acid-sulfate                           |
| C <sub>16</sub> H <sub>18</sub> O <sub>10</sub>                | 370.0900   | Ferulic acid-glucuronide                       |
| C <sub>9</sub> H <sub>10</sub> O <sub>4</sub>                  | 182.0597   | Dihydroxy-phenylpropionic acid                 |
| C <sub>9</sub> H <sub>10</sub> O <sub>3</sub>                  | 166.0630   | Hydroxy-phenylpropionic acid                   |
| C <sub>9</sub> H <sub>8</sub> O <sub>3</sub>                   | 164.0473   | Hydroxy-phenylacrylic acid                     |
| C <sub>10</sub> H <sub>12</sub> O <sub>4</sub>                 | 196.0736   | Hydroxy-methoxy-phenylpropionic acid           |
| C <sub>16</sub> H <sub>12</sub> O <sub>5</sub>                 | 284.0685   | Methoxy-apigenin                               |
| C <sub>17</sub> H <sub>14</sub> O <sub>5</sub>                 | 298.0841   | Dimethoxy-apigenin                             |
| C <sub>15</sub> H <sub>10</sub> O <sub>6</sub>                 | 286.4770   | Hydroxy-apigenin                               |
| C <sub>16</sub> H <sub>12</sub> O <sub>6</sub>                 | 300.0634   | Hydroxy-methoxy-apigenin                       |
| C <sub>17</sub> H <sub>14</sub> O <sub>6</sub>                 | 314.0790   | Hydroxy-dimethoxy-apigeninr                    |
| C <sub>18</sub> H <sub>16</sub> O <sub>6</sub>                 | 328.0947   | Hydroxy-trimethoxy-apigeninr                   |
| C <sub>15</sub> H <sub>10</sub> O <sub>8</sub> S               | 350.0096   | Apigenin-sulfate                               |
| C <sub>21</sub> H <sub>18</sub> O <sub>11</sub>                | 446.0849   | Apigenin-glucuronide                           |
| C <sub>27</sub> H <sub>26</sub> O <sub>17</sub>                | 622.1170   | Apigenin-diglucuronide                         |
| C <sub>15</sub> H <sub>10</sub> O <sub>11</sub> S <sub>2</sub> | 429.9665   | Apigenin-disulfate                             |
| C <sub>21</sub> H <sub>18</sub> O <sub>14</sub> S              | 526.0417   | Apigenin-glucuronide-sulfate                   |
| C <sub>15</sub> H <sub>10</sub> O <sub>9</sub> S               | 366.0046   | Hydroxy-apigenin-sulfate                       |
| C <sub>16</sub> H <sub>12</sub> O <sub>8</sub> S               | 364.0253   | Methoxy-apigenin-sulfate                       |
| C <sub>16</sub> H <sub>12</sub> O <sub>9</sub> S               | 380.0202   | Hydroxy-methoxy-apigenin-sulfate               |
| C <sub>22</sub> H <sub>20</sub> O <sub>11</sub>                | 460.1006   | Methoxy-apigenin-glucuronide                   |

|                                                                |          |                                                    |
|----------------------------------------------------------------|----------|----------------------------------------------------|
| C <sub>21</sub> H <sub>18</sub> O <sub>12</sub>                | 462.0798 | Hydroxy-apigenin-glucuronide                       |
| C <sub>22</sub> H <sub>20</sub> O <sub>12</sub>                | 476.0955 | Hydroxy-methoxy-apigenin-glucuronide               |
| C <sub>15</sub> H <sub>10</sub> O <sub>12</sub> S <sub>2</sub> | 445.9614 | Hydroxy-apigenin-disulfate                         |
| C <sub>27</sub> H <sub>28</sub> O <sub>18</sub>                | 638.1119 | Hydroxy-apigenin-diglucuronide                     |
| C <sub>21</sub> H <sub>18</sub> O <sub>15</sub> S              | 542.0366 | Hydroxy-apigenin-glucuronide-sulfate               |
| C <sub>27</sub> H <sub>30</sub> O <sub>14</sub>                | 578.1636 | Methoxy-isoschaftoside                             |
| C <sub>27</sub> H <sub>30</sub> O <sub>15</sub>                | 594.1585 | Hydroxy-methoxy-isoschaftoside                     |
| C <sub>26</sub> H <sub>28</sub> O <sub>15</sub>                | 580.1428 | Hydroxy-isoschaftoside                             |
| C <sub>28</sub> H <sub>32</sub> O <sub>14</sub>                | 592.1792 | Dimethoxy-isoschaftoside                           |
| C <sub>28</sub> H <sub>32</sub> O <sub>15</sub>                | 608.1741 | Hydroxy-dimethoxy-isoschaftoside                   |
| C <sub>26</sub> H <sub>28</sub> O <sub>17</sub> S              | 644.1047 | Isoschaftoside-sulfate                             |
| C <sub>26</sub> H <sub>28</sub> O <sub>20</sub> S <sub>2</sub> | 724.0618 | Isoschaftoside-disulfate                           |
| C <sub>26</sub> H <sub>28</sub> O <sub>21</sub> S <sub>2</sub> | 740.0564 | Hydroxy-isoschaftoside-disulfate                   |
| C <sub>32</sub> H <sub>36</sub> O <sub>20</sub>                | 740.1800 | Isoschaftoside-glucuronide                         |
| C <sub>32</sub> H <sub>26</sub> O <sub>23</sub> S              | 820.1368 | Isoschaftoside-glucuronide-sulfate                 |
| C <sub>38</sub> H <sub>44</sub> O <sub>26</sub>                | 916.2121 | Isoschaftoside-diglucuronide                       |
| C <sub>32</sub> H <sub>36</sub> O <sub>24</sub> S              | 836.1317 | Hydroxy-isoschaftoside-glucuronide-sulfate         |
| C <sub>38</sub> H <sub>44</sub> O <sub>27</sub>                | 932.2070 | Hydroxy-isoschaftoside-diglucuronide               |
| C <sub>33</sub> H <sub>38</sub> O <sub>20</sub>                | 754.1956 | Methoxy-isoschaftoside-glucuronide                 |
| C <sub>32</sub> H <sub>36</sub> O <sub>21</sub>                | 756.1749 | Hydroxy-isoschaftoside-glucuronide                 |
| C <sub>33</sub> H <sub>38</sub> O <sub>21</sub>                | 770.1906 | Hydroxy-methoxy-isoschaftoside-glucuronide         |
| C <sub>27</sub> H <sub>30</sub> O <sub>17</sub> S              | 658.1204 | Methoxy-isoschaftoside-sulfate                     |
| C <sub>26</sub> H <sub>28</sub> O <sub>18</sub> S              | 660.0996 | Hydroxy-isoschaftoside-sulfate                     |
| C <sub>27</sub> H <sub>30</sub> O <sub>18</sub> S              | 674.1153 | Hydroxy-methoxy-isoschaftoside-sulfate             |
| C <sub>22</sub> H <sub>22</sub> O <sub>10</sub>                | 446.1213 | Methoxy-apigenin-6-C-riboside                      |
| C <sub>22</sub> H <sub>22</sub> O <sub>11</sub>                | 462.1162 | Hydroxy-methoxy-apigenin-6-C-riboside              |
| C <sub>21</sub> H <sub>20</sub> O <sub>11</sub>                | 448.1006 | Hydroxy-apigenin-6-C-riboside                      |
| C <sub>23</sub> H <sub>24</sub> O <sub>10</sub>                | 460.1369 | Dimethoxy-apigenin-6-C-riboside                    |
| C <sub>23</sub> H <sub>24</sub> O <sub>11</sub>                | 476.1319 | Hydroxy-dimethoxy-apigenin-6-C-riboside            |
| C <sub>21</sub> H <sub>20</sub> O <sub>13</sub> S              | 512.0625 | Apigenin-6-C-riboside-sulfate                      |
| C <sub>21</sub> H <sub>20</sub> O <sub>16</sub> S <sub>2</sub> | 592.0193 | Apigenin-6-C-riboside-disulfate                    |
| C <sub>21</sub> H <sub>20</sub> O <sub>17</sub> S <sub>2</sub> | 608.0142 | Hydroxy-apigenin-6-C-riboside-disulfate            |
| C <sub>27</sub> H <sub>28</sub> O <sub>16</sub>                | 608.1377 | Apigenin-6-C-riboside-glucuronide                  |
| C <sub>27</sub> H <sub>28</sub> O <sub>19</sub> S              | 688.0945 | Apigenin-6-C-riboside-glucuronide-sulfate          |
| C <sub>33</sub> H <sub>36</sub> O <sub>22</sub>                | 784.1698 | Apigenin-6-C-riboside-diglucuronide                |
| C <sub>27</sub> H <sub>28</sub> O <sub>20</sub> S              | 704.0895 | Hydroxy-apigenin-6-C-riboside-glucuronide-sulfate  |
| C <sub>33</sub> H <sub>36</sub> O <sub>23</sub>                | 800.1647 | Hydroxy-apigenin-6-C-riboside-diglucuronide        |
| C <sub>28</sub> H <sub>30</sub> O <sub>16</sub>                | 622.1534 | Methoxy- apigenin-6-C-riboside-glucuronide         |
| C <sub>27</sub> H <sub>28</sub> O <sub>17</sub>                | 624.1326 | Hydroxy-apigenin-6-C-riboside-glucuronide          |
| C <sub>28</sub> H <sub>30</sub> O <sub>17</sub>                | 638.1483 | Hydroxy-methoxy- apigenin-6-C-riboside-glucuronide |
| C <sub>22</sub> H <sub>22</sub> O <sub>13</sub> S              | 526.0781 | Methoxy- apigenin-6-C-riboside-sulfate             |
| C <sub>21</sub> H <sub>20</sub> O <sub>14</sub> S              | 528.0574 | Hydroxy-apigenin-6-C-riboside-sulfate              |
| C <sub>22</sub> H <sub>22</sub> O <sub>14</sub> S              | 542.0730 | Hydroxy-methoxy-apigenin-6-C-riboside-sulfat       |
| C <sub>21</sub> H <sub>20</sub> O <sub>9</sub>                 | 416.1107 | Methoxy-apigenin-8-C-glucoside                     |
| C <sub>21</sub> H <sub>20</sub> O <sub>10</sub>                | 432.1056 | Hydroxy-methoxy- apigenin-8-C-glucoside            |
| C <sub>20</sub> H <sub>18</sub> O <sub>10</sub>                | 418.0900 | Hydroxy-apigenin-8-C-glucoside                     |
| C <sub>22</sub> H <sub>22</sub> O <sub>9</sub>                 | 430.1264 | Dimethoxy-apigenin-8-C-glucoside                   |

|                         |          |                                                    |
|-------------------------|----------|----------------------------------------------------|
| $C_{20}H_{20}O_{10}$    | 446.1213 | Hydroxy-dimethoxy-apigenin-8-C-glucoside           |
| $C_{20}H_{18}O_{12}S$   | 482.0519 | Apigenin-8-C-glucoside-sulfate                     |
| $C_{20}H_{18}O_{15}S_2$ | 562.0087 | Apigenin-8-C-glucoside-disulfate                   |
| $C_{20}H_{18}O_{16}S_2$ | 578.0036 | Hydroxy-apigenin-8-C-glucoside-disulfate           |
| $C_{26}H_{26}O_{15}$    | 578.1272 | Apigenin-8-C-glucoside-glucuronide                 |
| $C_{26}H_{26}O_{18}S$   | 658.0840 | Apigenin-8-C-glucoside-glucuronide-sulfate         |
| $C_{33}H_{34}O_{21}$    | 754.1593 | Apigenin-8-C-glucoside-diglucuronide               |
| $C_{26}H_{26}O_{19}S$   | 674.0789 | Hydroxy-apigenin-8-C-glucoside-glucuronide-sulfate |
| $C_{32}H_{34}O_{22}$    | 770.1542 | Hydroxy-apigenin-8-C-glucoside-diglucuronide       |
| $C_{27}H_{28}O_{15}$    | 592.1428 | Methoxy- Apigenin-8-C-glucoside-glucuronide        |
| $C_{26}H_{26}O_{16}$    | 594.1221 | Hydroxy-apigenin-8-C-glucoside-glucuronide         |
| $C_{27}H_{28}O_{16}$    | 608.1377 | Hydroxy-methoxy-apigenin-8-C-glucoside-glucuronide |
| $C_{21}H_{20}O_{12}S$   | 496.0675 | Methoxy-apigenin-8-C-glucoside-sulfate             |
| $C_{20}H_{18}O_{13}S$   | 498.0468 | Hydroxy-apigenin-8-C-glucoside-sulfate             |
| $C_{21}H_{20}O_{13}S$   | 512.0625 | Hydroxy-methoxy-apigenin-8-C-glucoside-sulfate     |

**Table S5.:** Compound library of vitexin.

| Molecular formula                                              | Exact mass | Compound                                       |
|----------------------------------------------------------------|------------|------------------------------------------------|
| C <sub>21</sub> H <sub>20</sub> O <sub>10</sub>                | 432.1056   | Vitexin                                        |
| C <sub>15</sub> H <sub>10</sub> O <sub>5</sub>                 | 270.528    | Apigenin                                       |
| C <sub>7</sub> H <sub>8</sub> O <sub>2</sub>                   | 124.0524   | Dihydroxy-toluene                              |
| C <sub>7</sub> H <sub>6</sub> O <sub>3</sub>                   | 138.0317   | Hydroxy-benzoic acid                           |
| C <sub>8</sub> H <sub>8</sub> O <sub>3</sub>                   | 152.0473   | Hydroxy-phenylacetic acid                      |
| C <sub>8</sub> H <sub>8</sub> O <sub>4</sub>                   | 168.0423   | Dihydroxy-phenylacetic acid                    |
| C <sub>9</sub> H <sub>10</sub> O <sub>4</sub>                  | 182.0579   | Hydroxy-methoxy-phenylacetic acid              |
| C <sub>6</sub> H <sub>6</sub> O <sub>3</sub>                   | 126.0317   | Phloroglucinol                                 |
| C <sub>6</sub> H <sub>6</sub> O <sub>6</sub> S                 | 205.9885   | Phloroglucinol-sulfate                         |
| C <sub>12</sub> H <sub>14</sub> O <sub>9</sub>                 | 302.0638   | Phloroglucinol-glucuronide                     |
| C <sub>7</sub> H <sub>8</sub> O <sub>3</sub>                   | 140.0473   | Methyl-phloroglucinol                          |
| C <sub>8</sub> H <sub>8</sub> O <sub>6</sub> S                 | 232.0042   | Hydroxy-phenylacetic acid-sulfate              |
| C <sub>14</sub> H <sub>16</sub> O <sub>9</sub>                 | 328.0794   | Hydroxy-phenylacetic acid-glucuronide          |
| C <sub>10</sub> H <sub>11</sub> NO <sub>4</sub>                | 209.0688   | Hydroxy-phenylacetic acid-glycine conjugate    |
| C <sub>11</sub> H <sub>11</sub> NO <sub>4</sub>                | 223.0845   | Hydroxy-phenylpropionic acid-glycine conjugate |
| C <sub>9</sub> H <sub>10</sub> O <sub>6</sub> S                | 246.0198   | Hydroxy-phenylpropionic acid-sulfate           |
| C <sub>15</sub> H <sub>18</sub> O <sub>9</sub>                 | 342.0951   | Hydroxy-phenylpropionic acid-glucuronide       |
| C <sub>15</sub> H <sub>16</sub> O <sub>9</sub>                 | 340.0794   | Hydroxy-cinnamic acid-glucuronide              |
| C <sub>9</sub> H <sub>8</sub> O <sub>6</sub> S                 | 244.0042   | Hydroxy-cinnamic acid-sulfate                  |
| C <sub>9</sub> H <sub>8</sub> O <sub>4</sub>                   | 180.0423   | Caffeic acid                                   |
| C <sub>9</sub> H <sub>8</sub> O <sub>7</sub> S                 | 259.9991   | Caffeic acid-sulfate                           |
| C <sub>15</sub> H <sub>16</sub> O <sub>10</sub>                | 356.0743   | Caffeic acid-glucuronide                       |
| C <sub>10</sub> H <sub>10</sub> O <sub>4</sub>                 | 194.0579   | Ferulic acid                                   |
| C <sub>10</sub> H <sub>10</sub> O <sub>7</sub> S               | 274.0147   | Ferulic acid-sulfate                           |
| C <sub>16</sub> H <sub>18</sub> O <sub>10</sub>                | 370.0900   | Ferulic acid-glucuronide                       |
| C <sub>9</sub> H <sub>10</sub> O <sub>4</sub>                  | 182.0597   | Dihydroxy-phenylpropionic acid                 |
| C <sub>9</sub> H <sub>10</sub> O <sub>3</sub>                  | 166.0630   | Hydroxy-phenylpropionic acid                   |
| C <sub>9</sub> H <sub>8</sub> O <sub>3</sub>                   | 164.0473   | Hydroxy-phenylacrylic acid                     |
| C <sub>10</sub> H <sub>12</sub> O <sub>4</sub>                 | 196.0736   | Hydroxy-methoxy-phenylpropionic acid           |
| C <sub>16</sub> H <sub>12</sub> O <sub>5</sub>                 | 284.0685   | Methoxy-apigenin                               |
| C <sub>17</sub> H <sub>14</sub> O <sub>5</sub>                 | 298.0841   | Dimethoxy-apigenin                             |
| C <sub>15</sub> H <sub>10</sub> O <sub>6</sub>                 | 286.477    | Hydroxy-apigenin                               |
| C <sub>16</sub> H <sub>12</sub> O <sub>6</sub>                 | 300.0634   | Hydroxy-methoxy-apigenin                       |
| C <sub>17</sub> H <sub>14</sub> O <sub>6</sub>                 | 314.0790   | Hydroxy-dimethoxy-apigenin                     |
| C <sub>18</sub> H <sub>16</sub> O <sub>6</sub>                 | 328.0947   | Hydroxy-trimethoxy-apigenin                    |
| C <sub>15</sub> H <sub>10</sub> O <sub>8</sub> S               | 350.0096   | Apigenin-sulfate                               |
| C <sub>21</sub> H <sub>18</sub> O <sub>11</sub>                | 446.0849   | Apigenin-glucuronide                           |
| C <sub>27</sub> H <sub>26</sub> O <sub>17</sub>                | 622.1170   | Apigenin-diglucuronide                         |
| C <sub>15</sub> H <sub>10</sub> O <sub>11</sub> S <sub>2</sub> | 429.9665   | Apigenin-disulfate                             |
| C <sub>21</sub> H <sub>18</sub> O <sub>14</sub> S              | 526.0417   | Apigenin-glucuronide-sulfate                   |
| C <sub>15</sub> H <sub>10</sub> O <sub>9</sub> S               | 366.0046   | Hydroxy-apigenin-sulfate                       |
| C <sub>16</sub> H <sub>12</sub> O <sub>8</sub> S               | 364.0253   | Methoxy-apigenin-sulfate                       |
| C <sub>16</sub> H <sub>12</sub> O <sub>9</sub> S               | 380.0202   | Hydroxy-methoxy-apigenin-sulfate               |
| C <sub>22</sub> H <sub>20</sub> O <sub>11</sub>                | 460.1006   | Methoxy-apigenin-glucuronide                   |

|                                                                |          |                                      |
|----------------------------------------------------------------|----------|--------------------------------------|
| C <sub>21</sub> H <sub>18</sub> O <sub>12</sub>                | 462.0798 | Hydroxy-apigenin-glucuronide         |
| C <sub>22</sub> H <sub>20</sub> O <sub>12</sub>                | 476.0955 | Hydroxy-methoxy-apigenin-glucuronide |
| C <sub>15</sub> H <sub>10</sub> O <sub>12</sub> S <sub>2</sub> | 445.9614 | Hydroxy-apigenin-disulfate           |
| C <sub>27</sub> H <sub>28</sub> O <sub>18</sub>                | 638.1119 | Hydroxy-apigenin-diglucuronide       |
| C <sub>21</sub> H <sub>18</sub> O <sub>15</sub> S              | 542.0366 | Hydroxy-apigenin-glucuronide-sulfate |
| C <sub>22</sub> H <sub>22</sub> O <sub>10</sub>                | 446.1213 | Methoxy-vitexin                      |
| C <sub>23</sub> H <sub>24</sub> O <sub>10</sub>                | 460.1369 | Dimethoxy-vitexin                    |
| C <sub>21</sub> H <sub>20</sub> O <sub>11</sub>                | 448.1006 | Hydroxy-vitexin                      |
| C <sub>21</sub> H <sub>20</sub> O <sub>12</sub>                | 464.0955 | Dihydroxy-vitexin                    |
| C <sub>22</sub> H <sub>22</sub> O <sub>11</sub>                | 462.1162 | Hydroxy-methoxy-vitexin              |
| C <sub>23</sub> H <sub>24</sub> O <sub>11</sub>                | 476.1319 | Hydroxy-dimethoxy-vitexin            |
| C <sub>22</sub> H <sub>22</sub> O <sub>12</sub>                | 478.1111 | Dihydroxy-methoxy-vitexin            |
| C <sub>23</sub> H <sub>24</sub> O <sub>12</sub>                | 492.1268 | Dihydroxy-dimethoxy-vitexin          |
| C <sub>21</sub> H <sub>20</sub> O <sub>13</sub> S              | 512.0625 | Vitexin-sulfate                      |
| C <sub>22</sub> H <sub>22</sub> O <sub>13</sub> S              | 526.0781 | Methoxy-vitexin-sulfate              |
| C <sub>21</sub> H <sub>20</sub> O <sub>14</sub> S              | 528.0574 | Hydroxy-vitexin-sulfate              |
| C <sub>22</sub> H <sub>20</sub> O <sub>14</sub> S              | 542.0730 | Hydroxy-methoxy-vitexin-sulfate      |
| C <sub>21</sub> H <sub>20</sub> O <sub>16</sub> S <sub>2</sub> | 592.0193 | Vitexin-disulfate                    |
| C <sub>27</sub> H <sub>28</sub> O <sub>16</sub>                | 608.1377 | Vitexin-glucuronide                  |
| C <sub>28</sub> H <sub>30</sub> O <sub>16</sub>                | 622.1534 | Methoxy-vitexin-glucuronide          |
| C <sub>27</sub> H <sub>28</sub> O <sub>17</sub>                | 624.1326 | Hydroxy-vitexin-glucuronide          |
| C <sub>28</sub> H <sub>30</sub> O <sub>17</sub>                | 638.1483 | Hydroxy-methoxy-vitexin-glucuronide  |
| C <sub>33</sub> H <sub>36</sub> O <sub>22</sub>                | 784.1698 | Vitexin-diglucuronide                |
| C <sub>27</sub> H <sub>28</sub> O <sub>19</sub> S              | 688.0945 | Vitexin-glucuronide-sulfate          |
| C <sub>27</sub> H <sub>28</sub> O <sub>20</sub> S              | 704.0895 | Hydroxy-vitexin-glucuronide-sulfate  |
| C <sub>21</sub> H <sub>20</sub> O <sub>17</sub> S <sub>2</sub> | 608.0142 | Hydroxy-vitexin-disulfate            |
| C <sub>33</sub> H <sub>36</sub> O <sub>23</sub>                | 800.1647 | Hydroxy-vitexin-diglucuronide        |

**Table S6.:** Compound library of isovitexin.

| Molecular formula                                              | Exact mass | Compound                                       |
|----------------------------------------------------------------|------------|------------------------------------------------|
| C <sub>21</sub> H <sub>20</sub> O <sub>10</sub>                | 432.1056   | Isovitexin                                     |
| C <sub>15</sub> H <sub>10</sub> O <sub>5</sub>                 | 270.528    | Apigenin                                       |
| C <sub>7</sub> H <sub>8</sub> O <sub>2</sub>                   | 124.0524   | Dihydroxy-toluene                              |
| C <sub>7</sub> H <sub>6</sub> O <sub>3</sub>                   | 138.0317   | Hydroxy-benzoic acid                           |
| C <sub>8</sub> H <sub>8</sub> O <sub>3</sub>                   | 152.0473   | Hydroxy-phenylacetic acid                      |
| C <sub>8</sub> H <sub>8</sub> O <sub>4</sub>                   | 168.0423   | Dihydroxy-phenylacetic acid                    |
| C <sub>9</sub> H <sub>10</sub> O <sub>4</sub>                  | 182.0579   | Hydroxy-methoxy-phenylacetic acid              |
| C <sub>6</sub> H <sub>6</sub> O <sub>3</sub>                   | 126.0317   | Phloroglucinol                                 |
| C <sub>6</sub> H <sub>6</sub> O <sub>6</sub> S                 | 205.9885   | Phloroglucinol-sulfate                         |
| C <sub>12</sub> H <sub>14</sub> O <sub>9</sub>                 | 302.0638   | Phloroglucinol-glucuronide                     |
| C <sub>7</sub> H <sub>8</sub> O <sub>3</sub>                   | 140.0473   | Methyl-phloroglucinol                          |
| C <sub>8</sub> H <sub>8</sub> O <sub>6</sub> S                 | 232.0042   | Hydroxy-phenylacetic acid-sulfate              |
| C <sub>14</sub> H <sub>16</sub> O <sub>9</sub>                 | 328.0794   | Hydroxy-phenylacetic acid-glucuronide          |
| C <sub>10</sub> H <sub>11</sub> NO <sub>4</sub>                | 209.0688   | Hydroxy-phenylacetic acid-glycine conjugate    |
| C <sub>11</sub> H <sub>11</sub> NO <sub>4</sub>                | 223.0845   | Hydroxy-phenylpropionic acid-glycine conjugate |
| C <sub>9</sub> H <sub>10</sub> O <sub>6</sub> S                | 246.0198   | Hydroxy-phenylpropionic acid-sulfate           |
| C <sub>15</sub> H <sub>18</sub> O <sub>9</sub>                 | 342.0951   | Hydroxy-phenylpropionic acid-glucuronide       |
| C <sub>15</sub> H <sub>16</sub> O <sub>9</sub>                 | 340.0794   | Hydroxy-cinnamic acid-glucuronide              |
| C <sub>9</sub> H <sub>8</sub> O <sub>6</sub> S                 | 244.0042   | Hydroxy-cinnamic acid-sulfate                  |
| C <sub>9</sub> H <sub>8</sub> O <sub>4</sub>                   | 180.0423   | Caffeic acid                                   |
| C <sub>9</sub> H <sub>8</sub> O <sub>7</sub> S                 | 259.9991   | Caffeic acid-sulfate                           |
| C <sub>15</sub> H <sub>16</sub> O <sub>10</sub>                | 356.0743   | Caffeic acid-glucuronide                       |
| C <sub>10</sub> H <sub>10</sub> O <sub>4</sub>                 | 194.0579   | Ferulic acid                                   |
| C <sub>10</sub> H <sub>10</sub> O <sub>7</sub> S               | 274.0147   | Ferulic acid-sulfate                           |
| C <sub>16</sub> H <sub>18</sub> O <sub>10</sub>                | 370.0900   | Ferulic acid-glucuronide                       |
| C <sub>9</sub> H <sub>10</sub> O <sub>4</sub>                  | 182.0597   | Dihydroxy-phenylpropionic acid                 |
| C <sub>9</sub> H <sub>10</sub> O <sub>3</sub>                  | 166.0630   | Hydroxy-phenylpropionic acid                   |
| C <sub>9</sub> H <sub>8</sub> O <sub>3</sub>                   | 164.0473   | Hydroxy-phenylacrylic acid                     |
| C <sub>10</sub> H <sub>12</sub> O <sub>4</sub>                 | 196.0736   | Hydroxy-methoxy-phenylpropionic acid           |
| C <sub>16</sub> H <sub>12</sub> O <sub>5</sub>                 | 284.0685   | Methoxy-apigenin                               |
| C <sub>17</sub> H <sub>14</sub> O <sub>5</sub>                 | 298.0841   | Dimethoxy-apigenin                             |
| C <sub>15</sub> H <sub>10</sub> O <sub>6</sub>                 | 286.477    | Hydroxy-apigenin                               |
| C <sub>16</sub> H <sub>12</sub> O <sub>6</sub>                 | 300.0634   | Hydroxy-methoxy-apigenin                       |
| C <sub>17</sub> H <sub>14</sub> O <sub>6</sub>                 | 314.0790   | Hydroxy-dimethoxy-apigenin                     |
| C <sub>18</sub> H <sub>16</sub> O <sub>6</sub>                 | 328.0947   | Hydroxy-trimethoxy-apigenin                    |
| C <sub>15</sub> H <sub>10</sub> O <sub>8</sub> S               | 350.0096   | Apigenin-sulfate                               |
| C <sub>21</sub> H <sub>18</sub> O <sub>11</sub>                | 446.0849   | Apigenin-glucuronide                           |
| C <sub>27</sub> H <sub>26</sub> O <sub>17</sub>                | 622.1170   | Apigenin-diglucuronide                         |
| C <sub>15</sub> H <sub>10</sub> O <sub>11</sub> S <sub>2</sub> | 429.9665   | Apigenin-disulfate                             |
| C <sub>21</sub> H <sub>18</sub> O <sub>14</sub> S              | 526.0417   | Apigenin-glucuronide-sulfate                   |
| C <sub>15</sub> H <sub>10</sub> O <sub>9</sub> S               | 366.0046   | Hydroxy-apigenin-sulfate                       |
| C <sub>16</sub> H <sub>12</sub> O <sub>8</sub> S               | 364.0253   | Methoxy-apigenin-sulfate                       |
| C <sub>16</sub> H <sub>12</sub> O <sub>9</sub> S               | 380.0202   | Hydroxy-methoxy-apigenin-sulfate               |
| C <sub>22</sub> H <sub>20</sub> O <sub>11</sub>                | 460.1006   | Methoxy-apigenin-glucuronide                   |

|                                                                |          |                                        |
|----------------------------------------------------------------|----------|----------------------------------------|
| C <sub>21</sub> H <sub>18</sub> O <sub>12</sub>                | 462.0798 | Hydroxy-apigenin-glucuronide           |
| C <sub>22</sub> H <sub>20</sub> O <sub>12</sub>                | 476.0955 | Hydroxy-methoxy-apigenin-glucuronide   |
| C <sub>15</sub> H <sub>10</sub> O <sub>12</sub> S <sub>2</sub> | 445.9614 | Hydroxy-apigenin-disulfate             |
| C <sub>27</sub> H <sub>28</sub> O <sub>18</sub>                | 638.1119 | Hydroxy-apigenin-diglucuronide         |
| C <sub>21</sub> H <sub>18</sub> O <sub>15</sub> S              | 542.0366 | Hydroxy-apigenin-glucuronide-sulfate   |
| C <sub>22</sub> H <sub>22</sub> O <sub>10</sub>                | 446.1213 | Methoxy-isovitexin                     |
| C <sub>23</sub> H <sub>24</sub> O <sub>10</sub>                | 460.1369 | Dimethoxy-isovitexin                   |
| C <sub>21</sub> H <sub>20</sub> O <sub>11</sub>                | 448.1006 | Hydroxy-isovitexin                     |
| C <sub>21</sub> H <sub>20</sub> O <sub>12</sub>                | 464.0955 | Dihydroxy-isovitexin                   |
| C <sub>22</sub> H <sub>22</sub> O <sub>11</sub>                | 462.1162 | Hydroxy-methoxy-isovitexin             |
| C <sub>23</sub> H <sub>24</sub> O <sub>11</sub>                | 476.1319 | Hydroxy-dimethoxy-isovitexin           |
| C <sub>22</sub> H <sub>22</sub> O <sub>12</sub>                | 478.1111 | Dihydroxy-methoxy-isovitexin           |
| C <sub>23</sub> H <sub>24</sub> O <sub>12</sub>                | 492.1268 | Dihydroxy-dimethoxy-isovitexin         |
| C <sub>21</sub> H <sub>20</sub> O <sub>13</sub> S              | 512.0625 | Isovitexin-sulfate                     |
| C <sub>22</sub> H <sub>22</sub> O <sub>13</sub> S              | 526.0781 | Methoxy-isovitexin-sulfate             |
| C <sub>21</sub> H <sub>20</sub> O <sub>14</sub> S              | 528.0574 | Hydroxy-isovitexin-sulfate             |
| C <sub>22</sub> H <sub>20</sub> O <sub>14</sub> S              | 542.0730 | Hydroxy-methoxy-isovitexin-sulfate     |
| C <sub>21</sub> H <sub>20</sub> O <sub>16</sub> S <sub>2</sub> | 592.0193 | Isovitexin-disulfate                   |
| C <sub>27</sub> H <sub>28</sub> O <sub>16</sub>                | 608.1377 | Isovitexin-glucuronide                 |
| C <sub>28</sub> H <sub>30</sub> O <sub>16</sub>                | 622.1534 | Methoxy-isovitexin-glucuronide         |
| C <sub>27</sub> H <sub>28</sub> O <sub>17</sub>                | 624.1326 | Hydroxy-isovitexin-glucuronide         |
| C <sub>28</sub> H <sub>30</sub> O <sub>17</sub>                | 638.1483 | Hydroxy-methoxy-isovitexin-glucuronide |
| C <sub>33</sub> H <sub>36</sub> O <sub>22</sub>                | 784.1698 | Isovitexin-diglucuronide               |
| C <sub>27</sub> H <sub>28</sub> O <sub>19</sub> S              | 688.0945 | Isovitexin-glucuronide-sulfate         |
| C <sub>27</sub> H <sub>28</sub> O <sub>20</sub> S              | 704.0895 | Hydroxy-isovitexin-glucuronide-sulfate |
| C <sub>21</sub> H <sub>20</sub> O <sub>17</sub> S <sub>2</sub> | 608.0142 | Hydroxy-isovitexin-disulfate           |
| C <sub>33</sub> H <sub>36</sub> O <sub>23</sub>                | 800.1647 | Hydroxy-isovitexin-diglucuronide       |

**Table S7.:** Detected metabolites of orientin with an initial concentration of 10  $\mu$ M and an incubation time of three hours in the Caco-2 cell metabolism assay. K: Compartment, RT: retention time, A: apical compartment, B: basolateral compartment, C: cell lysate

| K | RT [min] | [M-H] <sup>-</sup> (m/z)<br>found | [M-H] <sup>-</sup> (m/z)<br>calculated | Molecular<br>formula                              | Possible metabolite      |
|---|----------|-----------------------------------|----------------------------------------|---------------------------------------------------|--------------------------|
| A | 3.146    | 527.0494                          | 527.0501                               | C <sub>21</sub> H <sub>20</sub> O <sub>14</sub> S | Orientin-sulfate         |
| B | 3.209    | 527.0500                          | 527.0501                               | C <sub>21</sub> H <sub>20</sub> O <sub>14</sub> S | Orientin-sulfate         |
| A | 8.516    | 477.1035                          | 477.1038                               | C <sub>22</sub> H <sub>22</sub> O <sub>12</sub>   | Hydroxy-methoxy-orientin |
| B | 8.539    | 477.1035                          | 477.1038                               | C <sub>22</sub> H <sub>22</sub> O <sub>12</sub>   | Hydroxy-methoxy-orientin |
| A | 9.597    | 461.1086                          | 461.1089                               | C <sub>22</sub> H <sub>22</sub> O <sub>11</sub>   | Methoxy-orientin         |



**Table S8.:** Detected metabolites of orientin with an initial concentration of 100  $\mu$ M and an incubation time of three hours in the Caco-2 cell metabolization assay. K: Compartment, RT: retention time, A: apical compartment, B: basolateral compartment, C: cell lysate

| K | RT [min] | [M-H] <sup>-</sup> (m/z)<br>found | [M-H] <sup>-</sup> (m/z)<br>calculated | Molecular<br>formula                              | Possible metabolite          |
|---|----------|-----------------------------------|----------------------------------------|---------------------------------------------------|------------------------------|
| A | 3.204    | 527.0499                          | 527.0501                               | C <sub>21</sub> H <sub>20</sub> O <sub>14</sub> S | Orientin-sulfate             |
| B | 3.162    | 527.0493                          | 527.0501                               | C <sub>21</sub> H <sub>20</sub> O <sub>14</sub> S | Orientin-sulfate             |
| A | 4.402    | 463.0870                          | 463.0882                               | C <sub>21</sub> H <sub>20</sub> O <sub>12</sub>   | Hydroxy-orientin             |
| A | 5.134    | 477.0675                          | 477.0675                               | C <sub>21</sub> H <sub>18</sub> O <sub>13</sub>   | Hydroxy-luteolin-glucuronide |
| A | 6.073    | 299.0559                          | 299.0561                               | C <sub>16</sub> H <sub>12</sub> O <sub>6</sub>    | Methoxy-luteolin             |
| A | 8.497    | 477.1034                          | 477.1038                               | C <sub>22</sub> H <sub>22</sub> O <sub>12</sub>   | Hydroxy-methoxy-orientin     |
| A | 9.578    | 461.1089                          | 461.1089                               | C <sub>22</sub> H <sub>22</sub> O <sub>11</sub>   | Methoxy-orientin             |

**Table S9.:** Detected metabolites of orientin with an initial concentration of 10  $\mu$ M and an incubation time of five hours in the Caco-2 cell metabolization assay. K: Compartment, RT: retention time, A: apical compartment, B: basolateral compartment, C: cell lysate

| K | RT [min] | [M-H] <sup>-</sup> (m/z)<br>found | [M-H] <sup>-</sup> (m/z)<br>calculated | Molecular<br>formula                              | Possible metabolite |
|---|----------|-----------------------------------|----------------------------------------|---------------------------------------------------|---------------------|
| A | 3.007    | 527.0507                          | 527.0501                               | C <sub>21</sub> H <sub>20</sub> O <sub>14</sub> S | Orientin-sulfate    |
| A | 9.459    | 461.1091                          | 461.1089                               | C <sub>22</sub> H <sub>22</sub> O <sub>11</sub>   | Methoxy-orientin    |

**Table S10.:** Detected metabolites of orientin with an initial concentration of 100  $\mu$ M and an incubation time of five hours in the Caco-2 cell metabolization assay. K: Compartment, RT: retention time, A: apical compartment, B: basolateral compartment, C: cell lysate

| K | RT [min] | [M-H] <sup>-</sup> (m/z)<br>found | [M-H] <sup>-</sup> (m/z)<br>calculated | Molecular<br>formula                              | Possible metabolite          |
|---|----------|-----------------------------------|----------------------------------------|---------------------------------------------------|------------------------------|
| A | 3.001    | 527.0501                          | 527.0501                               | C <sub>21</sub> H <sub>20</sub> O <sub>14</sub> S | Orientin-sulfate             |
| A | 4.184    | 463.0846                          | 463.0882                               | C <sub>21</sub> H <sub>20</sub> O <sub>12</sub>   | Hydroxy-orientin             |
| A | 5.044    | 477.0657                          | 477.0675                               | C <sub>21</sub> H <sub>18</sub> O <sub>13</sub>   | Hydroxy-luteolin-glucuronide |
| A | 8.340    | 477.1029                          | 477.1038                               | C <sub>22</sub> H <sub>22</sub> O <sub>12</sub>   | Hydroxy-methoxy-orientin     |
| A | 9.450    | 461.1085                          | 461.1089                               | C <sub>22</sub> H <sub>22</sub> O <sub>11</sub>   | Methoxy-orientin             |
| C | 9.382    | 461.1088                          | 461.1089                               | C <sub>22</sub> H <sub>22</sub> O <sub>11</sub>   | Methoxy-orientin             |

**Table S11.:** Detected metabolites of isoorientin with an initial concentration of 10  $\mu\text{M}$  and an incubation time of three hours in the Caco-2 cell metabolization assay. K: Compartment, RT: retention time, A: apical compartment, B: basolateral compartment, C: cell lysate

| K | RT [min] | [M-H] <sup>-</sup> (m/z) found | [M-H] <sup>-</sup> (m/z) calculated | Molecular formula                                 | Possible metabolite          |
|---|----------|--------------------------------|-------------------------------------|---------------------------------------------------|------------------------------|
| A | 2.514    | 527.0500                       | 527.0501                            | C <sub>21</sub> H <sub>20</sub> O <sub>14</sub> S | Isoorientin-sulfate          |
| A | 5.107    | 527.0497                       | 527.0501                            | C <sub>21</sub> H <sub>20</sub> O <sub>14</sub> S | Isoorientin-sulfate          |
| B | 2.439    | 527.0500                       | 527.0501                            | C <sub>21</sub> H <sub>20</sub> O <sub>14</sub> S | Isoorientin-sulfate          |
| A | 4.044    | 463.0880                       | 463.0882                            | C <sub>21</sub> H <sub>20</sub> O <sub>12</sub>   | Hydroxy-isoorientin          |
| A | 5.476    | 461.0723                       | 461.0725                            | C <sub>21</sub> H <sub>18</sub> O <sub>12</sub>   | Luteolin-glucuronide         |
| A | 5.467    | 477.0672                       | 477.0675                            | C <sub>21</sub> H <sub>18</sub> O <sub>13</sub>   | Hydroxy-luteolin-glucuronide |
| A | 8.290    | 477.1034                       | 477.1038                            | C <sub>22</sub> H <sub>22</sub> O <sub>12</sub>   | Hydroxy-methoxy-isoorientin  |
| B | 8.284    | 477.1046                       | 477.1038                            | C <sub>22</sub> H <sub>22</sub> O <sub>12</sub>   | Hydroxy-methoxy-isoorientin  |
| A | 9.890    | 461.1089                       | 461.1089                            | C <sub>22</sub> H <sub>22</sub> O <sub>11</sub>   | Methoxy-isoorientin          |
| A | 10.479   | 461.1089                       | 461.1089                            | C <sub>22</sub> H <sub>22</sub> O <sub>11</sub>   | Methoxy-isoorientin          |

**Table S12.:** Detected metabolites of isoorientin with an initial concentration of 100  $\mu\text{M}$  and an incubation time of three hours in the Caco-2 cell metabolization assay. K: Compartment, RT: retention time, A: apical compartment, B: basolateral compartment, C: cell lysate

| K | RT [min] | [M-H] <sup>-</sup> (m/z) found | [M-H] <sup>-</sup> (m/z) calculated | Molecular formula                                 | Possible metabolite          |
|---|----------|--------------------------------|-------------------------------------|---------------------------------------------------|------------------------------|
| A | 2.494    | 527.0501                       | 527.0501                            | C <sub>21</sub> H <sub>20</sub> O <sub>14</sub> S | Isoorientin-sulfate          |
| A | 5.069    | 527.0505                       | 527.0501                            | C <sub>21</sub> H <sub>20</sub> O <sub>14</sub> S | Isoorientin-sulfate          |
| B | 2.491    | 527.0498                       | 527.0501                            | C <sub>21</sub> H <sub>20</sub> O <sub>14</sub> S | Isoorientin-sulfate          |
| B | 5.008    | 527.0499                       | 527.0501                            | C <sub>21</sub> H <sub>20</sub> O <sub>14</sub> S | Isoorientin-sulfate          |
| C | 5.116    | 527.0495                       | 527.0501                            | C <sub>21</sub> H <sub>20</sub> O <sub>14</sub> S | Isoorientin-sulfate          |
| A | 4.031    | 463.0883                       | 463.0882                            | C <sub>21</sub> H <sub>20</sub> O <sub>12</sub>   | Hydroxy-isoorientin          |
| A | 5.739    | 541.0654                       | 541.0657                            | C <sub>22</sub> H <sub>22</sub> O <sub>14</sub> S | Methoxy-isoorientin-sulfate  |
| A | 6.503    | 541.0655                       | 541.0657                            | C <sub>22</sub> H <sub>22</sub> O <sub>14</sub> S | Methoxy-isoorientin-sulfate  |
| A | 5.393    | 461.0723                       | 461.0725                            | C <sub>21</sub> H <sub>18</sub> O <sub>12</sub>   | Luteolin-glucuronide         |
| A | 5.427    | 477.0674                       | 477.0675                            | C <sub>21</sub> H <sub>18</sub> O <sub>13</sub>   | Hydroxy-luteolin-glucuronide |
| A | 6.204    | 299.0550                       | 299.0561                            | C <sub>16</sub> H <sub>12</sub> O <sub>6</sub>    | Methoxy-luteolin             |
| A | 8.232    | 477.1040                       | 477.1038                            | C <sub>22</sub> H <sub>22</sub> O <sub>12</sub>   | Hydroxy-methoxy-isoorientin  |
| B | 8.252    | 477.1042                       | 477.1038                            | C <sub>22</sub> H <sub>22</sub> O <sub>12</sub>   | Hydroxy-methoxy-isoorientin  |
| A | 9.843    | 461.1087                       | 461.1089                            | C <sub>22</sub> H <sub>22</sub> O <sub>11</sub>   | Methoxy-isoorientin          |
| A | 10.457   | 461.1088                       | 461.1089                            | C <sub>22</sub> H <sub>22</sub> O <sub>11</sub>   | Methoxy-isoorientin          |
| B | 10.441   | 461.1089                       | 461.1089                            | C <sub>22</sub> H <sub>22</sub> O <sub>11</sub>   | Methoxy-isoorientin          |
| C | 10.566   | 461.1084                       | 461.1089                            | C <sub>22</sub> H <sub>22</sub> O <sub>11</sub>   | Methoxy-isoorientin          |

**Table S13.:** Detected metabolites of isoorientin with an initial concentration of 10  $\mu$ M and an incubation time of five hours in the Caco-2 cell metabolization assay. K: Compartment, RT: retention time, A: apical compartment, B: basolateral compartment, C: cell lysate

| K | RT [min] | [M-H] <sup>-</sup> (m/z)<br>found | [M-H] <sup>-</sup> (m/z)<br>calculated | Molecular<br>formula                              | Possible metabolite         |
|---|----------|-----------------------------------|----------------------------------------|---------------------------------------------------|-----------------------------|
| A | 2.332    | 527.0505                          | 527.0501                               | C <sub>21</sub> H <sub>20</sub> O <sub>14</sub> S | Isoorientin-sulfate         |
| A | 4.673    | 527.0507                          | 527.0501                               | C <sub>21</sub> H <sub>20</sub> O <sub>14</sub> S | Isoorientin-sulfate         |
| A | 6.221    | 477.1034                          | 477.1038                               | C <sub>22</sub> H <sub>22</sub> O <sub>12</sub>   | Hydroxy-methoxy-isoorientin |
| A | 9.474    | 461.1085                          | 461.1089                               | C <sub>22</sub> H <sub>22</sub> O <sub>11</sub>   | Methoxy-isoorientin         |
| A | 10.079   | 461.1080                          | 461.1089                               | C <sub>22</sub> H <sub>22</sub> O <sub>11</sub>   | Methoxy-isoorientin         |

**Table S14.:** Detected metabolites of isoorientin with an initial concentration of 100  $\mu$ M and an incubation time of five hours in the Caco-2 cell metabolization assay. K: Compartment, RT: retention time, A: apical compartment, B: basolateral compartment, C: cell lysate

| K | RT [min] | [M-H] <sup>-</sup> (m/z)<br>found | [M-H] <sup>-</sup> (m/z)<br>calculated | Molecular<br>formula                              | Possible metabolite          |
|---|----------|-----------------------------------|----------------------------------------|---------------------------------------------------|------------------------------|
| A | 2.308    | 527.0493                          | 527.0501                               | C <sub>21</sub> H <sub>20</sub> O <sub>14</sub> S | Isoorientin-sulfate          |
| A | 4.644    | 527.0500                          | 527.0501                               | C <sub>21</sub> H <sub>20</sub> O <sub>14</sub> S | Isoorientin-sulfate          |
| B | 2.296    | 527.0496                          | 527.0501                               | C <sub>21</sub> H <sub>20</sub> O <sub>14</sub> S | Isoorientin-sulfate          |
| B | 4.682    | 527.0500                          | 527.0501                               | C <sub>21</sub> H <sub>20</sub> O <sub>14</sub> S | Isoorientin-sulfate          |
| C | 4.692    | 527.0521                          | 527.0501                               | C <sub>21</sub> H <sub>20</sub> O <sub>14</sub> S | Isoorientin-sulfate          |
| A | 4.178    | 463.0885                          | 463.0882                               | C <sub>21</sub> H <sub>20</sub> O <sub>12</sub>   | Hydroxy-isoorientin          |
| A | 5.206    | 541.0654                          | 541.0657                               | C <sub>21</sub> H <sub>22</sub> O <sub>14</sub> S | Methoxy-isoorientin-sulfate  |
| A | 5.972    | 541.0649                          | 541.0657                               | C <sub>21</sub> H <sub>22</sub> O <sub>14</sub> S | Methoxy-isoorientin-sulfate  |
| A | 5.181    | 461.0717                          | 461.0725                               | C <sub>21</sub> H <sub>18</sub> O <sub>12</sub>   | Luteolin-glucuronide         |
| A | 5.232    | 477.0665                          | 477.0675                               | C <sub>21</sub> H <sub>18</sub> O <sub>13</sub>   | Hydroxy-luteolin-glucuronide |
| A | 9.496    | 461.1089                          | 461.1089                               | C <sub>22</sub> H <sub>22</sub> O <sub>11</sub>   | Methoxy-isoorientin          |
| A | 10.106   | 461.1090                          | 461.1089                               | C <sub>22</sub> H <sub>22</sub> O <sub>11</sub>   | Methoxy-isoorientin          |
| C | 10.178   | 461.1107                          | 461.1089                               | C <sub>22</sub> H <sub>22</sub> O <sub>11</sub>   | Methoxy-isoorientin          |

**Table S15.:** Detected metabolites of schaftoside with an initial concentration of 10  $\mu$ M and an incubation time of three hours in the Caco-2 cell metabolization assay. K: Compartment, RT: retention time, A: apical compartment, B: basolateral compartment, C: cell lysate

| K | RT [min] | [M-H] <sup>-</sup> (m/z)<br>found | [M-H] <sup>-</sup> (m/z)<br>calculated | Molecular<br>formula                            | Possible metabolite         |
|---|----------|-----------------------------------|----------------------------------------|-------------------------------------------------|-----------------------------|
| A | 7.732    | 593.1509                          | 593.1512                               | C <sub>27</sub> H <sub>30</sub> O <sub>15</sub> | Hydroxy-methoxy-schaftoside |

**Table S16.:** Detected metabolites of schaftoside with an initial concentration of 100  $\mu$ M and an incubation time of three hours in the Caco-2 cell metabolization assay. K: Compartment, RT: retention time, A: apical compartment, B: basolateral compartment, C: cell lysate

| K | RT [min] | [M-H] <sup>-</sup> (m/z)<br>found | [M-H] <sup>-</sup> (m/z)<br>calculated | Molecular<br>formula                            | Possible metabolite         |
|---|----------|-----------------------------------|----------------------------------------|-------------------------------------------------|-----------------------------|
| A | 5.804    | 579.1350                          | 579.1355                               | C <sub>26</sub> H <sub>28</sub> O <sub>15</sub> | Hydroxy-schaftoside         |
| A | 7.716    | 593.1506                          | 593.1512                               | C <sub>27</sub> H <sub>30</sub> O <sub>15</sub> | Hydroxy-methoxy-schaftoside |
| B | 7.744    | 593.1507                          | 593.1512                               | C <sub>27</sub> H <sub>30</sub> O <sub>15</sub> | Hydroxy-methoxy-schaftoside |

**Table S17.:** Detected metabolites of schaftoside with an initial concentration of 10  $\mu$ M and an incubation time of five hours in the Caco-2 cell metabolization assay. K: Compartment, RT: retention time, A: apical compartment, B: basolateral compartment, C: cell lysate

| K | RT [min] | [M-H] <sup>-</sup> (m/z)<br>found | [M-H] <sup>-</sup> (m/z)<br>calculated | Molecular<br>formula                            | Possible metabolite         |
|---|----------|-----------------------------------|----------------------------------------|-------------------------------------------------|-----------------------------|
| A | 7.383    | 593.1513                          | 593.1512                               | C <sub>27</sub> H <sub>30</sub> O <sub>15</sub> | Hydroxy-methoxy-schaftoside |

**Table S18.:** Detected metabolites of schaftoside with an initial concentration of 100  $\mu$ M and an incubation time of five hours in the Caco-2 cell metabolization assay. K: Compartment, RT: retention time, A: apical compartment, B: basolateral compartment, C: cell lysate

| K | RT [min] | [M-H] <sup>-</sup> (m/z)<br>found | [M-H] <sup>-</sup> (m/z)<br>calculated | Molecular<br>formula                            | Possible metabolite         |
|---|----------|-----------------------------------|----------------------------------------|-------------------------------------------------|-----------------------------|
| A | 5.524    | 579.1349                          | 579.1355                               | C <sub>26</sub> H <sub>28</sub> O <sub>15</sub> | Hydroxy-schaftoside         |
| A | 7.549    | 593.1512                          | 593.1512                               | C <sub>27</sub> H <sub>30</sub> O <sub>15</sub> | Hydroxy-methoxy-schaftoside |

**Table S19.:** Detected metabolites of isoschaftoside with an initial concentration of 10  $\mu$ M and an incubation time of three hours in the Caco-2 cell metabolization assay. K: Compartment, RT: retention time, A: apical compartment, B: basolateral compartment, C: cell lysate

| K | RT [min] | [M-H] <sup>-</sup> (m/z)<br>found | [M-H] <sup>-</sup> (m/z)<br>calculated | Molecular<br>formula                            | Possible metabolite            |
|---|----------|-----------------------------------|----------------------------------------|-------------------------------------------------|--------------------------------|
| A | 8.720    | 593.1511                          | 593.1512                               | C <sub>27</sub> H <sub>30</sub> O <sub>15</sub> | Hydroxy-methoxy-isoschaftoside |

**Table S20.:** Detected metabolites of isoschaftoside with an initial concentration of 100  $\mu$ M and an incubation time of three hours in the Caco-2 cell metabolization assay. K: Compartment, RT: retention time, A: apical compartment, B: basolateral compartment, C: cell lysate

| K | RT [min] | [M-H] <sup>-</sup> (m/z) found | [M-H] <sup>-</sup> (m/z) calculated | Molecular formula                               | Possible metabolite              |
|---|----------|--------------------------------|-------------------------------------|-------------------------------------------------|----------------------------------|
| A | 8.705    | 593.1499                       | 593.1512                            | C <sub>27</sub> H <sub>30</sub> O <sub>15</sub> | Hydroxy-methoxy-isoschaftoside   |
| B | 8.710    | 593.1513                       | 593.1512                            | C <sub>27</sub> H <sub>30</sub> O <sub>15</sub> | Hydroxy-methoxy-isoschaftoside   |
| A | 10.712   | 577.1565                       | 577.1563                            | C <sub>27</sub> H <sub>30</sub> O <sub>14</sub> | Methoxy-isoschaftoside           |
| A | 11.597   | 607.1668                       | 607.1668                            | C <sub>28</sub> H <sub>32</sub> O <sub>15</sub> | Hydroxy-dimethoxy-isoschaftoside |

**Table S21.:** Detected metabolites of isoschaftoside with an initial concentration of 100  $\mu$ M and an incubation time of five hours in the Caco-2 cell metabolization assay. K: Compartment, RT: retention time, A: apical compartment, B: basolateral compartment, C: cell lysate

| K | RT [min] | [M-H] <sup>-</sup> (m/z) found | [M-H] <sup>-</sup> (m/z) calculated | Molecular formula                               | Possible metabolite              |
|---|----------|--------------------------------|-------------------------------------|-------------------------------------------------|----------------------------------|
| A | 8.469    | 593.1456                       | 593.1512                            | C <sub>27</sub> H <sub>30</sub> O <sub>15</sub> | Hydroxy-methoxy-isoschaftoside   |
| A | 11.464   | 607.1668                       | 607.1668                            | C <sub>28</sub> H <sub>32</sub> O <sub>15</sub> | Hydroxy-dimethoxy-isoschaftoside |

**Table S22.:** Detected metabolites of vitexin with an initial concentration of 100  $\mu$ M and an incubation time of three hours in the Caco-2 cell metabolization assay. K: Compartment, RT: retention time, A: apical compartment, B: basolateral compartment, C: cell lysate

| K | RT [min] | [M-H] <sup>-</sup> (m/z) found | [M-H] <sup>-</sup> (m/z) calculated | Molecular formula                               | Possible metabolite     |
|---|----------|--------------------------------|-------------------------------------|-------------------------------------------------|-------------------------|
| A | 9.615    | 461.1091                       | 461.1089                            | C <sub>22</sub> H <sub>22</sub> O <sub>11</sub> | Hydroxy-methoxy-vitexin |
| B | 9.646    | 461.1092                       | 461.1089                            | C <sub>22</sub> H <sub>22</sub> O <sub>11</sub> | Hydroxy-methoxy-vitexin |

**Table S23.:** Detected metabolites of vitexin with an initial concentration of 100  $\mu$ M and an incubation time of five hours in the Caco-2 cell metabolization assay. K: Compartment, RT: retention time, A: apical compartment, B: basolateral compartment, C: cell lysate

| K | RT [min] | [M-H] <sup>-</sup> (m/z) found | [M-H] <sup>-</sup> (m/z) calculated | Molecular formula                               | Possible metabolite |
|---|----------|--------------------------------|-------------------------------------|-------------------------------------------------|---------------------|
| A | 5.695    | 447.0934                       | 447.0933                            | C <sub>21</sub> H <sub>20</sub> O <sub>11</sub> | Hydroxy-vitexin     |

**Table S24.:** Detected metabolites of isovitexin with an initial concentration of 10  $\mu$ M and an incubation time of three hours in the Caco-2 cell metabolization assay. K: Compartment, RT: retention time, A: apical compartment, B: basolateral compartment, C: cell lysate

| K | RT [min] | [M-H] <sup>-</sup> (m/z)<br>found | [M-H] <sup>-</sup> (m/z)<br>calculated | Molecular<br>formula                             | Possible metabolite              |
|---|----------|-----------------------------------|----------------------------------------|--------------------------------------------------|----------------------------------|
| A | 8.491    | 447.0934                          | 447.0933                               | C <sub>21</sub> H <sub>20</sub> O <sub>11</sub>  | Hydroxy-isovitexin               |
| A | 8.912    | 445.1140                          | 445.1140                               | C <sub>22</sub> H <sub>22</sub> O <sub>10</sub>  | Methoxy-isovitexin               |
| A | 9.468    | 461.1093                          | 461.1089                               | C <sub>22</sub> H <sub>22</sub> O <sub>11</sub>  | Hydroxy-methoxy-isovitexin       |
| A | 11.658   | 364.9978                          | 364.9973                               | C <sub>15</sub> H <sub>10</sub> O <sub>9</sub> S | Hydroxy-apigenin-sulfate         |
| A | 11.909   | 379.0133                          | 379.0129                               | C <sub>16</sub> H <sub>12</sub> O <sub>9</sub> S | Hydroxy-methoxy-apigenin-sulfate |
| A | 11.910   | 299.0564                          | 299.0561                               | C <sub>16</sub> H <sub>12</sub> O <sub>6</sub>   | Hydroxy-methoxy-apigenin         |

**Table S25.:** Detected metabolites of isovitexin with an initial concentration of 100  $\mu$ M and an incubation time of three hours in the Caco-2 cell metabolization assay. K: Compartment, RT: retention time, A: apical compartment, B: basolateral compartment, C: cell lysate

| K | RT [min] | [M-H] <sup>-</sup> (m/z)<br>found | [M-H] <sup>-</sup> (m/z)<br>calculated | Molecular<br>formula                             | Possible metabolite              |
|---|----------|-----------------------------------|----------------------------------------|--------------------------------------------------|----------------------------------|
| A | 8.501    | 447.0928                          | 447.0933                               | C <sub>21</sub> H <sub>20</sub> O <sub>11</sub>  | Hydroxy-isovitexin               |
| A | 8.905    | 445.1144                          | 445.1140                               | C <sub>21</sub> H <sub>22</sub> O <sub>10</sub>  | Methoxy-isovitexin               |
| A | 9.451    | 461.1098                          | 461.1089                               | C <sub>22</sub> H <sub>22</sub> O <sub>11</sub>  | Hydroxy-methoxy-isovitexin       |
| A | 11.648   | 364.9978                          | 364.9973                               | C <sub>15</sub> H <sub>10</sub> O <sub>9</sub> S | Hydroxy-apigenin-sulfate         |
| A | 11.651   | 475.1251                          | 475.1246                               | C <sub>23</sub> H <sub>24</sub> O <sub>11</sub>  | Hydroxy-dimethoxy-isovitexin     |
| B | 11.654   | 475.1248                          | 475.1246                               | C <sub>23</sub> H <sub>24</sub> O <sub>11</sub>  | Hydroxy-dimethoxy-isovitexin     |
| A | 11.900   | 299.0562                          | 299.0561                               | C <sub>16</sub> H <sub>12</sub> O <sub>6</sub>   | Hydroxy-methoxy-apigenin         |
| A | 11.957   | 379.0135                          | 379.0129                               | C <sub>16</sub> H <sub>12</sub> O <sub>9</sub> S | Hydroxy-methoxy-apigenin-sulfate |
| B | 11.903   | 379.0131                          | 379.0129                               | C <sub>16</sub> H <sub>12</sub> O <sub>9</sub> S | Hydroxy-methoxy-apigenin-sulfate |

**Table S26.:** Detected metabolites of isovitexin with an initial concentration of 10  $\mu$ M and an incubation time of five hours in the Caco-2 cell metabolization assay. K: Compartment, RT: retention time, A: apical compartment, B: basolateral compartment, C: cell lysate

| K | RT [min] | [M-H] <sup>-</sup> (m/z)<br>found | [M-H] <sup>-</sup> (m/z)<br>calculated | Molecular<br>formula                             | Possible metabolite              |
|---|----------|-----------------------------------|----------------------------------------|--------------------------------------------------|----------------------------------|
| A | 8.569    | 447.0937                          | 447.0933                               | C <sub>21</sub> H <sub>20</sub> O <sub>11</sub>  | Hydroxy-isovitexin               |
| A | 9.564    | 461.1093                          | 461.1089                               | C <sub>22</sub> H <sub>22</sub> O <sub>11</sub>  | Hydroxy-methoxy-isovitexin       |
| A | 11.681   | 475.1248                          | 475.1246                               | C <sub>23</sub> H <sub>24</sub> O <sub>11</sub>  | Hydroxy-dimethoxy-isovitexin     |
| A | 11.702   | 364.9976                          | 364.9973                               | C <sub>15</sub> H <sub>10</sub> O <sub>9</sub> S | Hydroxy-apigenin-sulfate         |
| A | 11.953   | 379.0133                          | 379.0129                               | C <sub>16</sub> H <sub>12</sub> O <sub>9</sub> S | Hydroxy-methoxy-apigenin-sulfate |

**Table S27.:** Detected metabolites of isovitexin with an initial concentration of 100  $\mu$ M and an incubation time of five hours in the Caco-2 cell metabolization assay. K: Compartment, RT: retention time, A: apical compartment, B: basolateral compartment, C: cell lysate

| K | RT [min] | [M-H] <sup>-</sup> (m/z)<br>found | [M-H] <sup>-</sup> (m/z)<br>calculated | Molecular<br>formula                             | Possible metabolite              |
|---|----------|-----------------------------------|----------------------------------------|--------------------------------------------------|----------------------------------|
| A | 8.514    | 447.0932                          | 447.0933                               | C <sub>21</sub> H <sub>20</sub> O <sub>11</sub>  | Hydroxy-isovitexin               |
| A | 8.951    | 445.1145                          | 445.1140                               | C <sub>21</sub> H <sub>22</sub> O <sub>10</sub>  | Methoxy-isovitexin               |
| A | 9.478    | 461.1099                          | 461.1089                               | C <sub>22</sub> H <sub>22</sub> O <sub>11</sub>  | Hydroxy-methoxy-isovitexin       |
| A | 11.655   | 364.9984                          | 364.9973                               | C <sub>15</sub> H <sub>10</sub> O <sub>9</sub> S | Hydroxy-apigenin-sulfate         |
| A | 11.656   | 475.1252                          | 475.1246                               | C <sub>23</sub> H <sub>24</sub> O <sub>11</sub>  | Hydroxy-dimethoxy-isovitexin     |
| A | 11.906   | 299.0566                          | 299.0561                               | C <sub>16</sub> H <sub>12</sub> O <sub>6</sub>   | Hydroxy-methoxy-apigenin         |
| A | 11.960   | 379.0131                          | 379.0129                               | C <sub>16</sub> H <sub>12</sub> O <sub>9</sub> S | Hydroxy-methoxy-apigenin-sulfate |
| B | 11.908   | 379.0132                          | 379.0129                               | C <sub>16</sub> H <sub>12</sub> O <sub>9</sub> S | Hydroxy-methoxy-apigenin-sulfate |
